# Supplementary material for: Selective sensing of picric acid using a Zn(ii)-metallacycle: experimental and theoretical validation of the sensing mechanism and quantitative analysis of sensitivity in contact mode detection
Source: Royal Society of Chemistry journal article supplement (doi:10.1039/d4dt01771d), 2024-01-01
Supplement: d4dt01771d1.pdf [file d4dt01771d1.pdf]

Electronic Supplementary Information

## **Selective Sensing of Picric Acid using a Zn(II)-metallacycle: Experimental and Theoretical Validation of Sensing Mechanism and Quantitative Analysis of Sensitivity in Contact Mode Detection using Zn(II) metallacycle**

Vishakha Jaswal<sup>[a]</sup>, Sanya Pachisia<sup>[b,c]</sup>, Jagrity Chaudhary<sup>[d]</sup>, Krishnan Rangan<sup>[e]</sup>, and Madhushree Sarkar\*<sup>[a]</sup>

<sup>[a]</sup>Department of Chemistry, Birla Institute of Technology and Science, Pilani, Pilani Campus, Rajasthan 333031 India.

E-mail: [msarkar@pilani.bits-pilani.ac.in](mailto:msarkar@pilani.bits-pilani.ac.in)

<sup>[b]</sup> Department of Chemistry, University of Delhi, India.

<sup>[c]</sup> Department of Chemistry, University of California, Irvine, California, USA.

<sup>[d]</sup> Department of Chemistry, Purdue University, West Lafayette, Indiana, USA

<sup>[e]</sup> Department of Chemistry, BITS Pilani, Hyderabad Campus, Jawahar Nagar Shameerpet Mandal, Ranga Reddy District, Hyderabad 500078, India

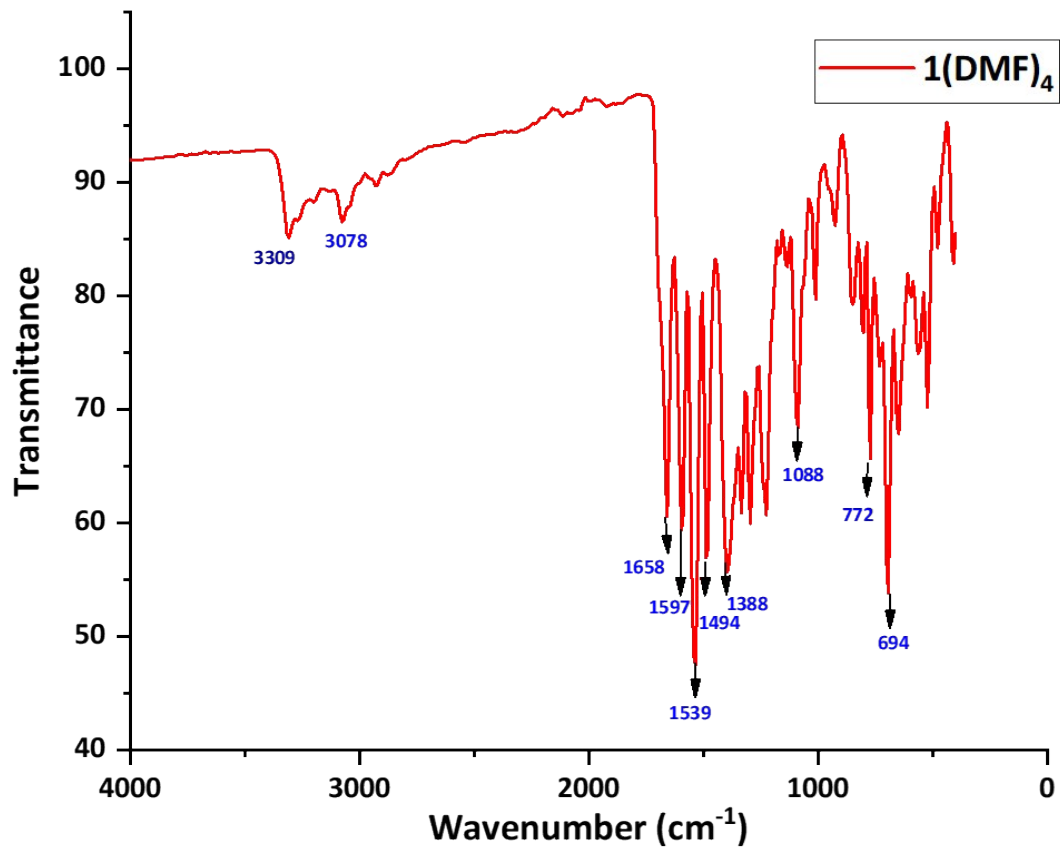

Figure S1. IR Spectrum of 1(DMF)<sub>4</sub>.

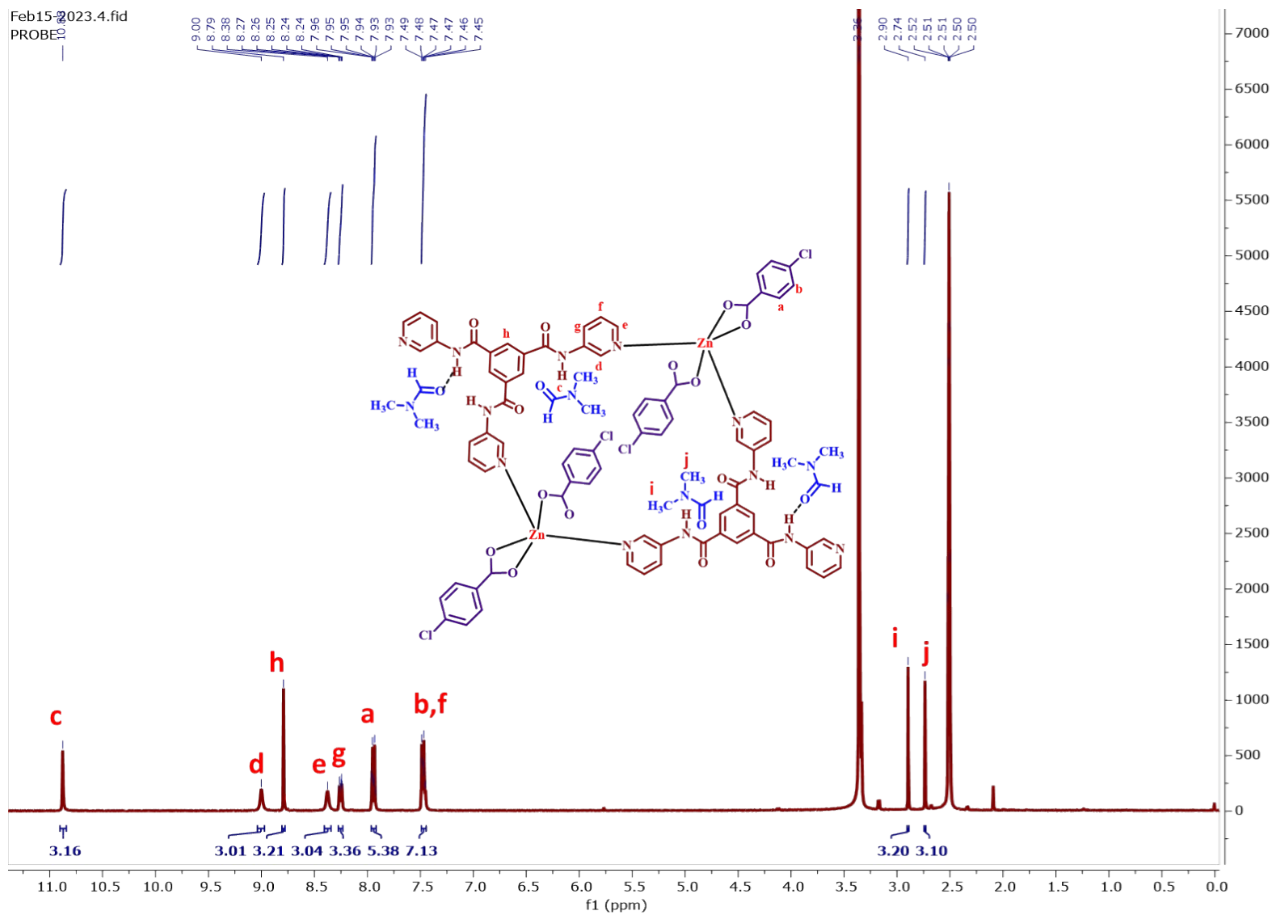

Figure S2.  $^1\text{H-NMR}$  ( $\text{DMSO-}d_6$ ) spectrum of  $1(\text{DMF})_4$ .

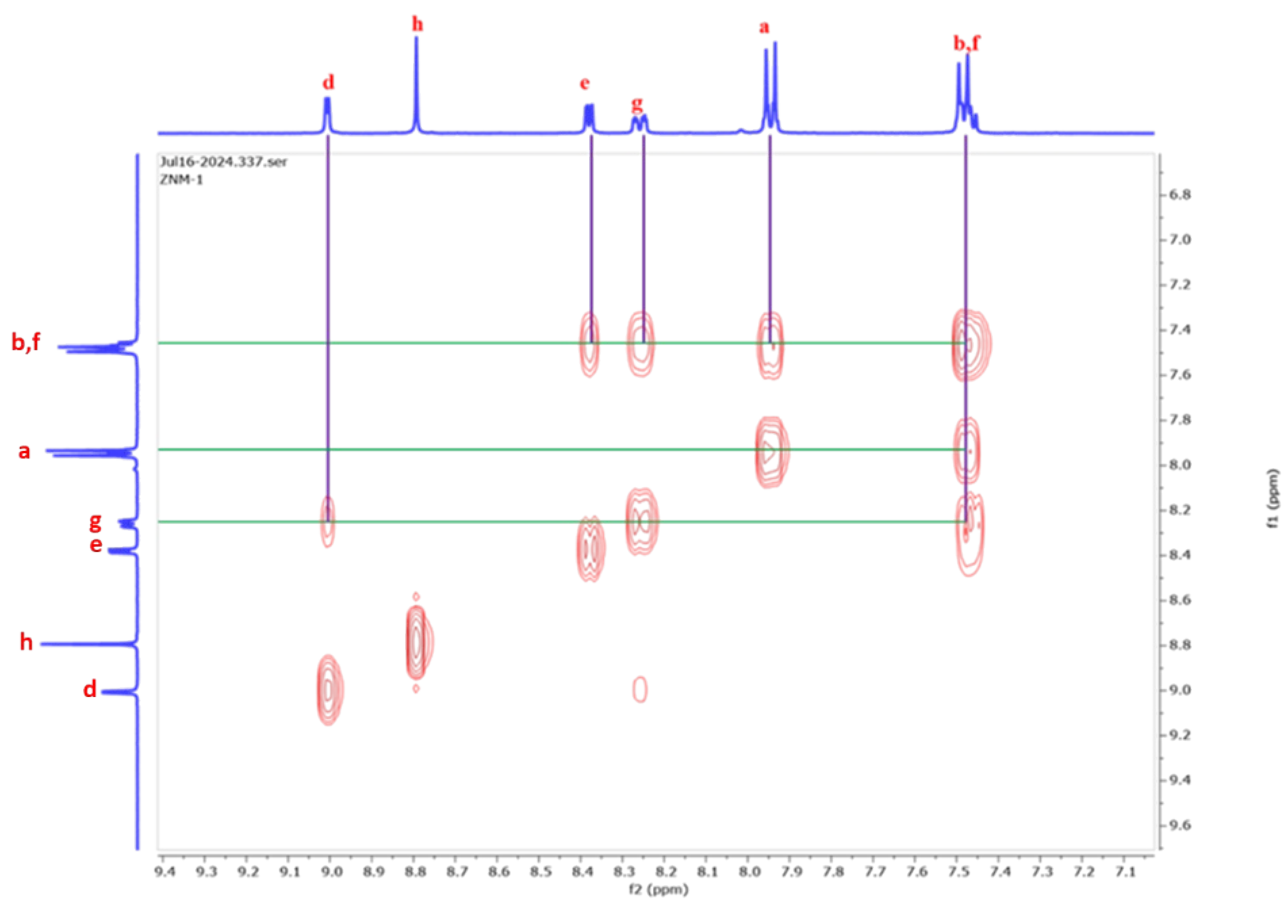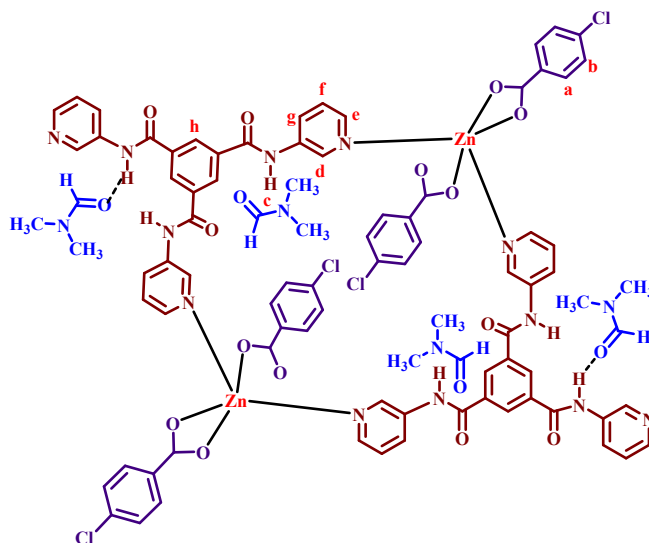

Figure S3. COSY-NMR (DMSO- $d_6$ ) spectrum of **1(DMF)<sub>4</sub>**.

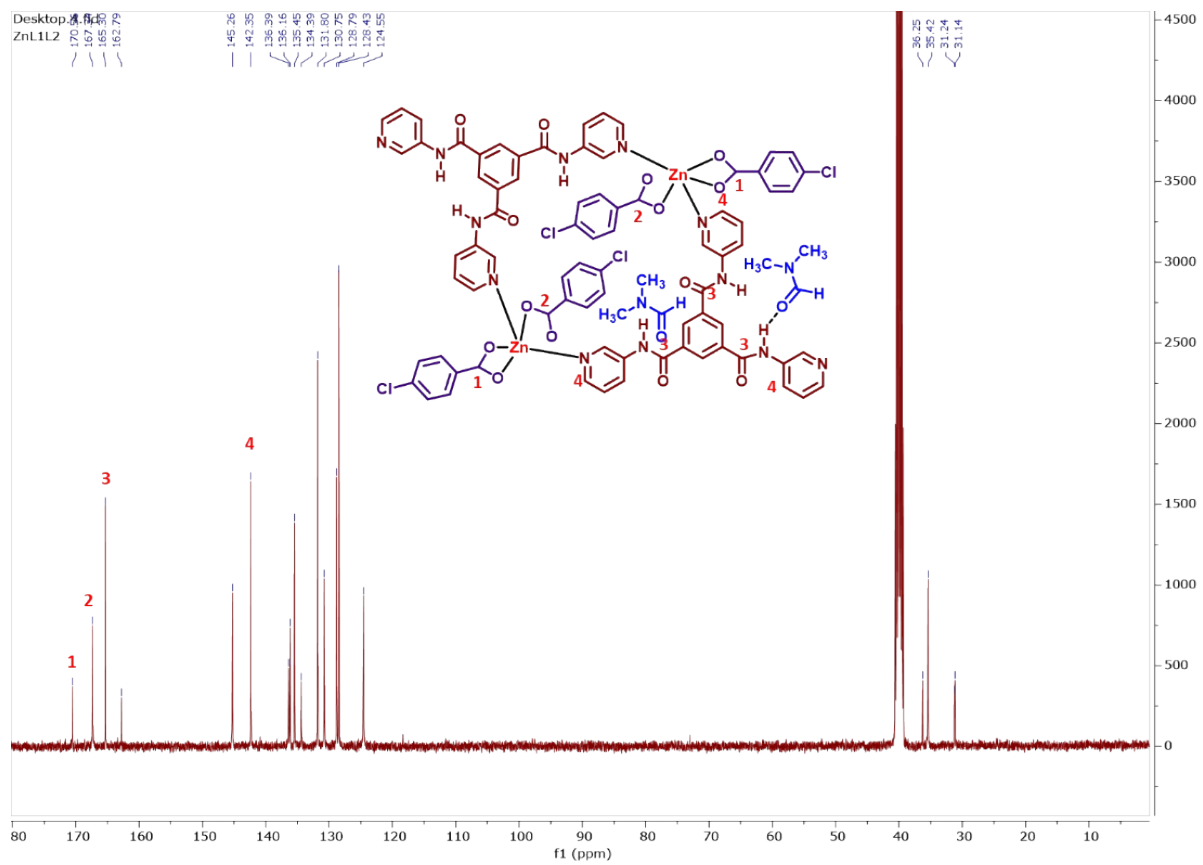

**Figure S4.** <sup>13</sup>C-NMR (DMSO-d<sub>6</sub>) spectrum of **1(DMF)<sub>4</sub>**.

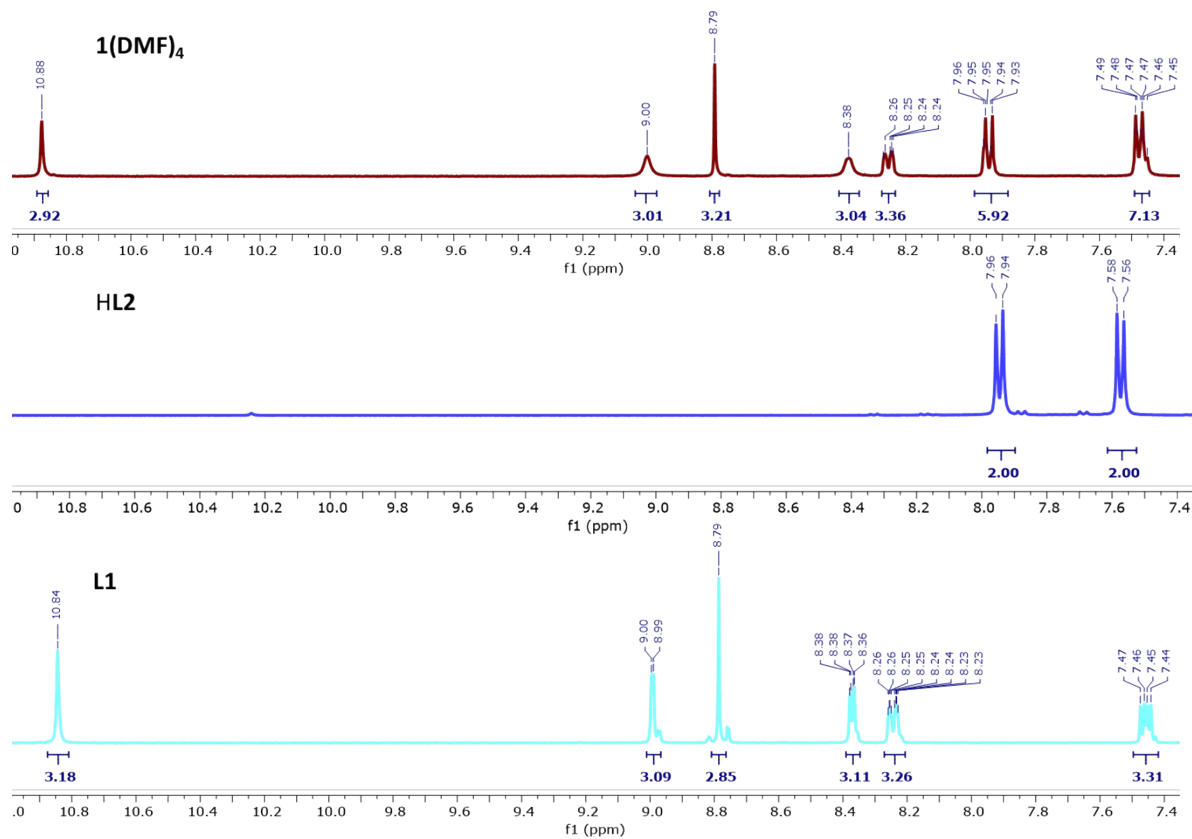

Figure S5. Comparison of  $^1\text{H-NMR}$  ( $\text{DMSO-d}_6$ ) spectra of L1, HL2 and  $1(\text{DMF})_4$ .

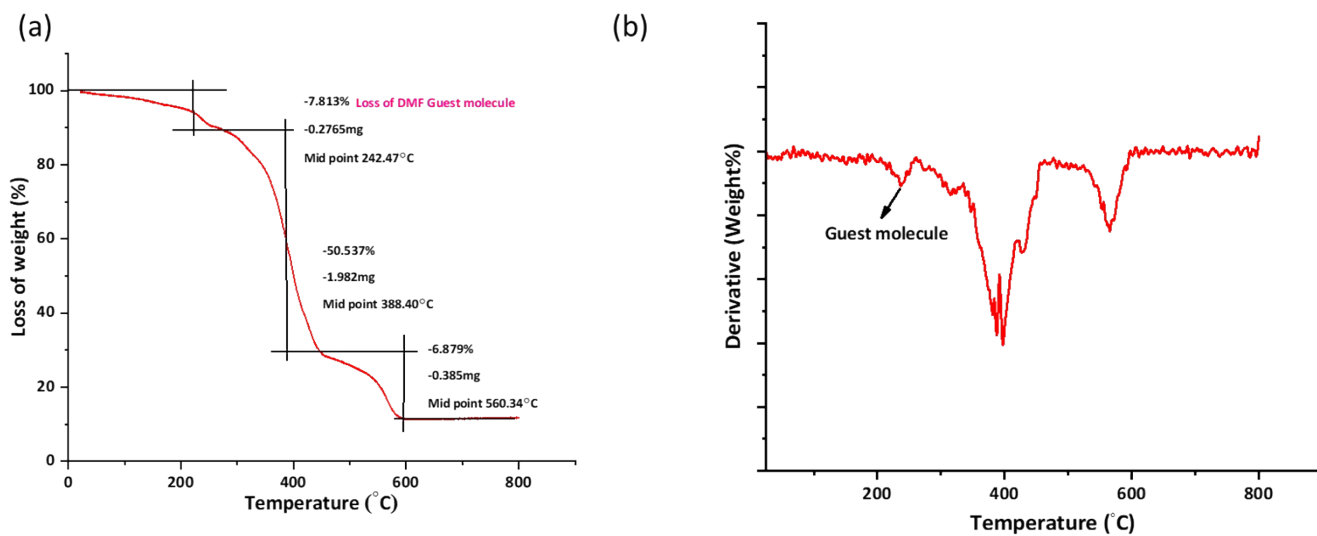

Figure S6. (a) TGA; (b) DTA-TG of  $1(\text{DMF})_4$ .

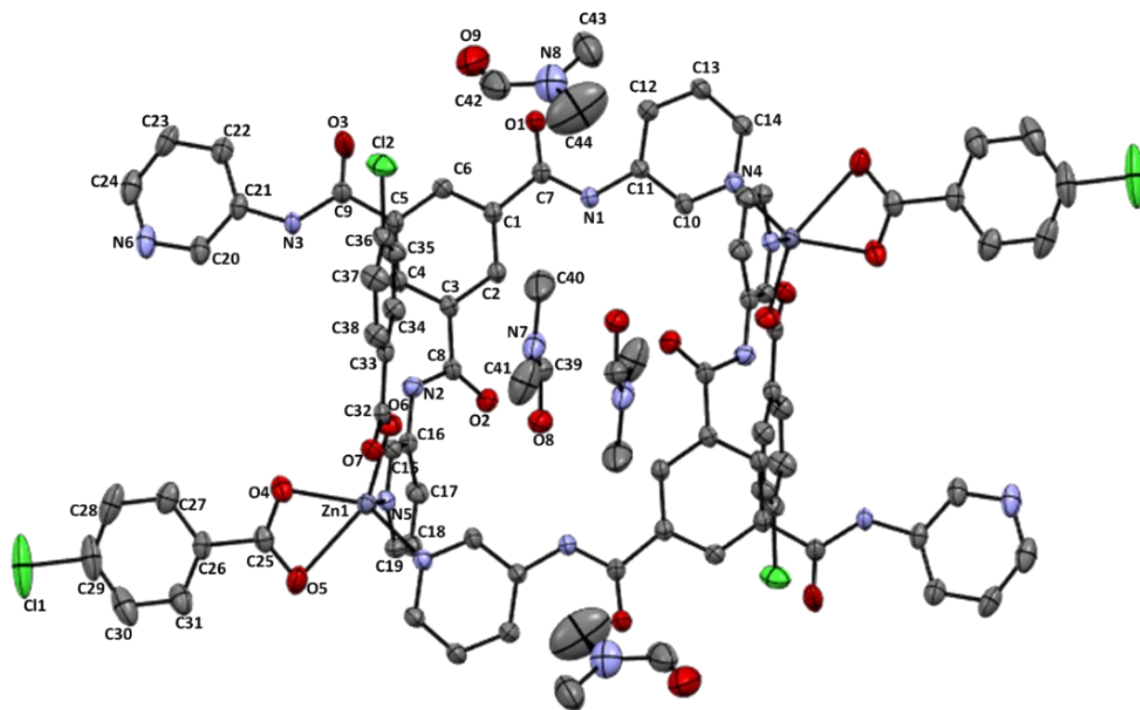

**Figure S7.** ORTEP of 1(DMF)<sub>4</sub> to show the atom numbering; Thermal ellipsoids shown at 50% probability (H atoms are not shown for clarity).

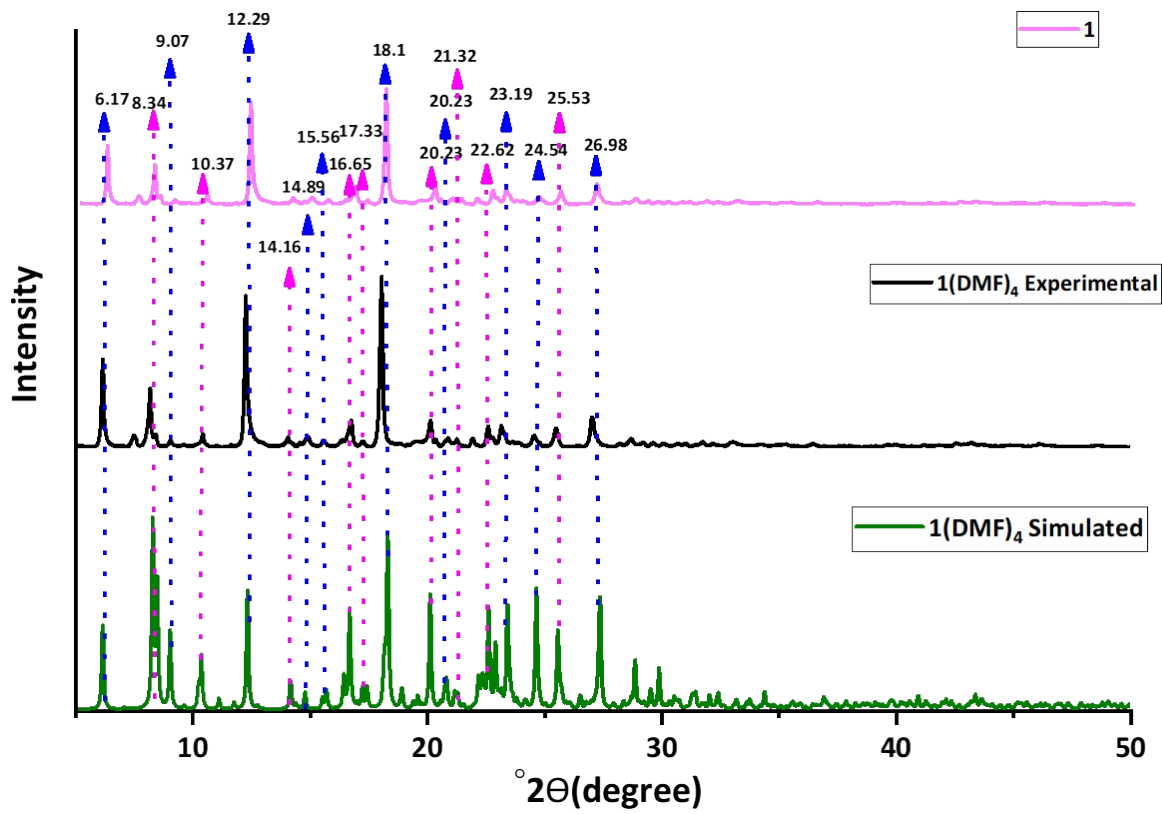

Figure S8. PXRD of  $1(\text{DMF})_4$ : Simulated  $1(\text{DMF})_4$ , Experimental  $1(\text{DMF})_4$  and  $1$  (without DMF)



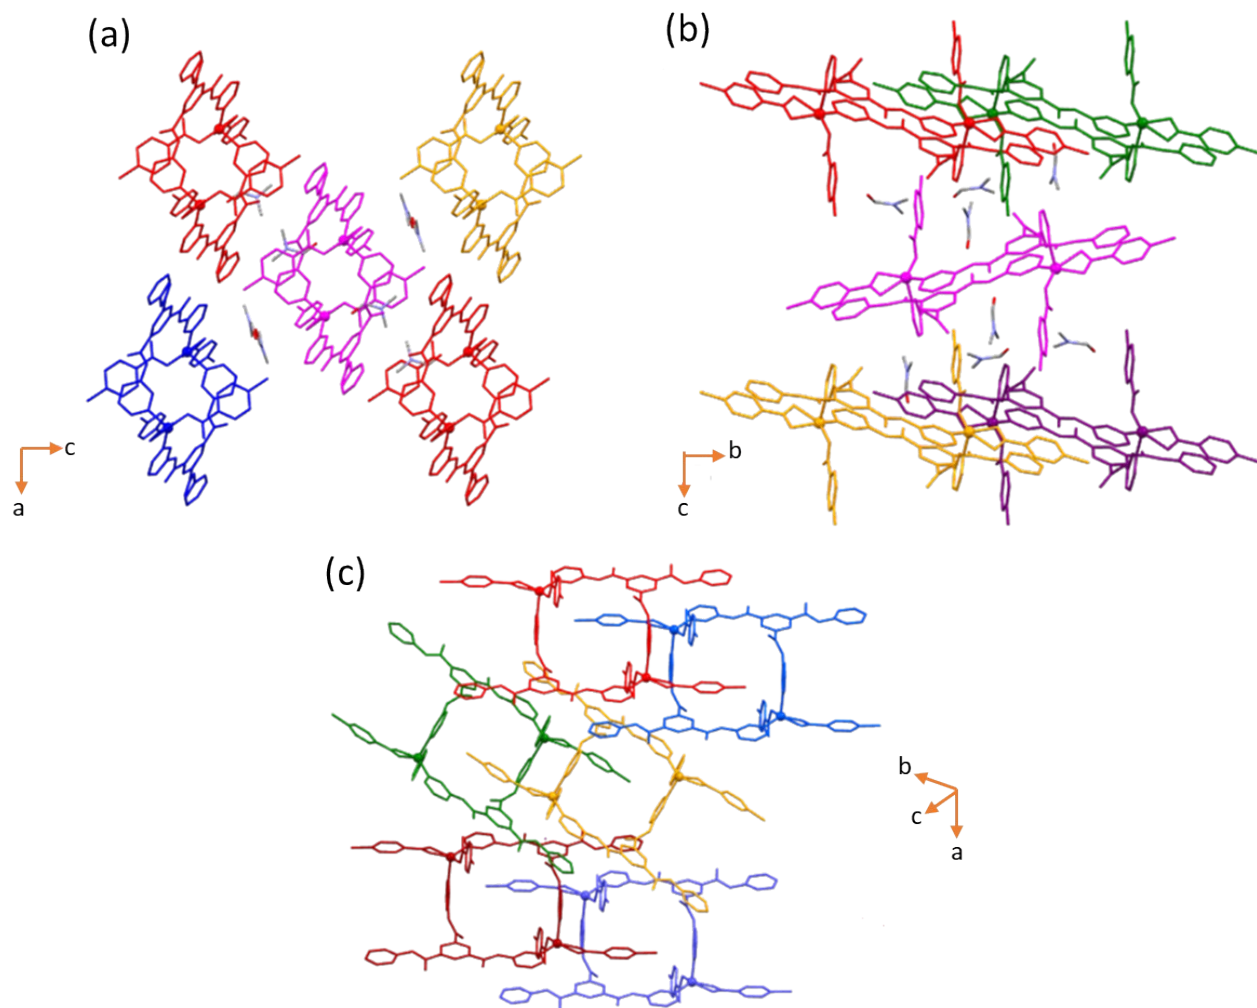

Figure S9. Packing of the rings in  $1(\text{DMF})_4$ .

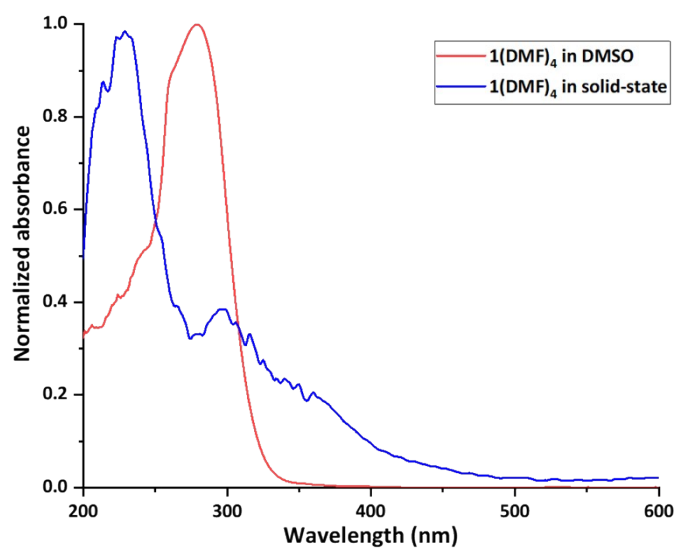

**Figure S10.** Normalized UV-Visible absorption spectra of **1(DMF)<sub>4</sub>** in solid state and in DMSO (concentration =  $1 \times 10^{-5}$  M;  $\lambda_{\text{max}} = 278$  nm;  $\epsilon = 38959$  M<sup>-1</sup> cm<sup>-1</sup>; Concentration of **1(DMF)<sub>4</sub>** is calculated by taking its asymmetric unit, molecular weight of 961.11).

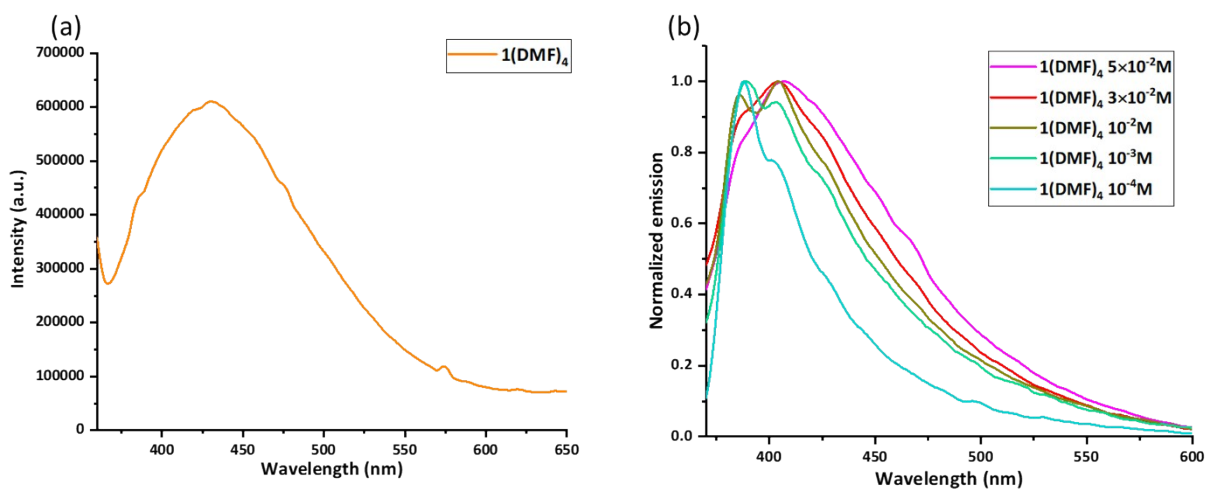

**Figure S11.** Photoluminescence spectra of **1(DMF)<sub>4</sub>** (a) in solid-state and (Excitation wavelength = 350 nm, slit width = 2.5 nm) (b) in DMSO at different concentrations (Excitation wavelength = 350 nm, slit width = 4 nm) (Concentration of **1(DMF)<sub>4</sub>** is calculated by taking its asymmetric unit, molecular weight of 961.11).

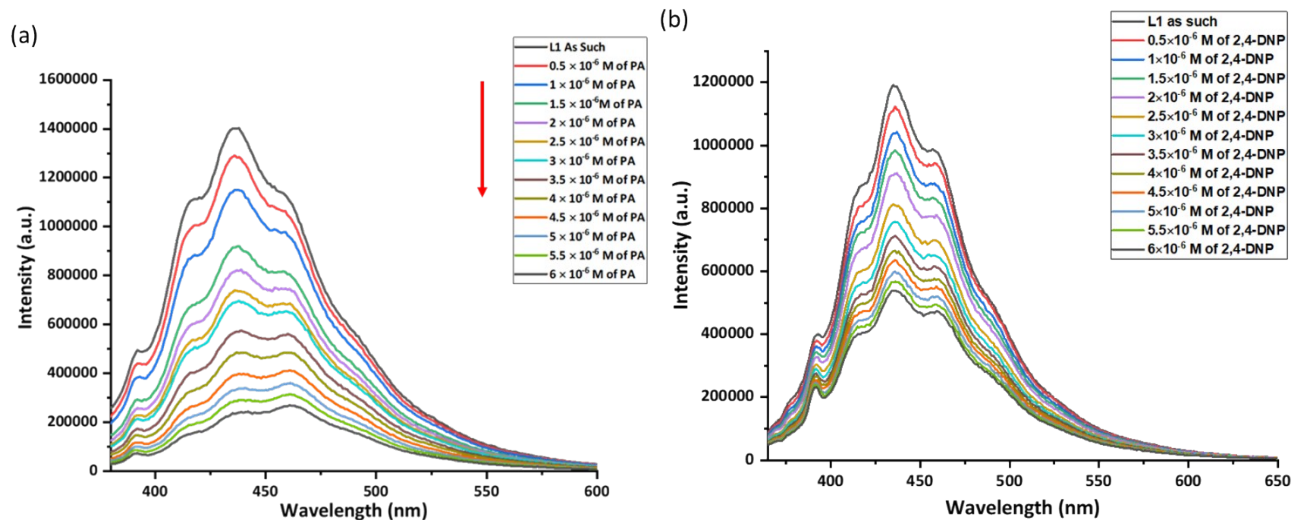

**Figure S12.** Fluorescence titrations of **L1** (10<sup>-2</sup> M) DMSO with (a) PA (10<sup>-5</sup> M) and (b) 2,4-DNP (10<sup>-5</sup> M).

Note: For preparing the solution for each measurement, 100  $\mu$ L DMSO solution of 10<sup>-5</sup> M analyte (PA or 2,4-DNP) was added to 1.99 mL of 10<sup>-2</sup> M solution of **L1** in DMSO to make a final volume of 2 mL. Similarly, other solutions were prepared by varying the concentration of the analyte and **1(DMF)<sub>4</sub>** while maintaining the final volume to 2 mL.

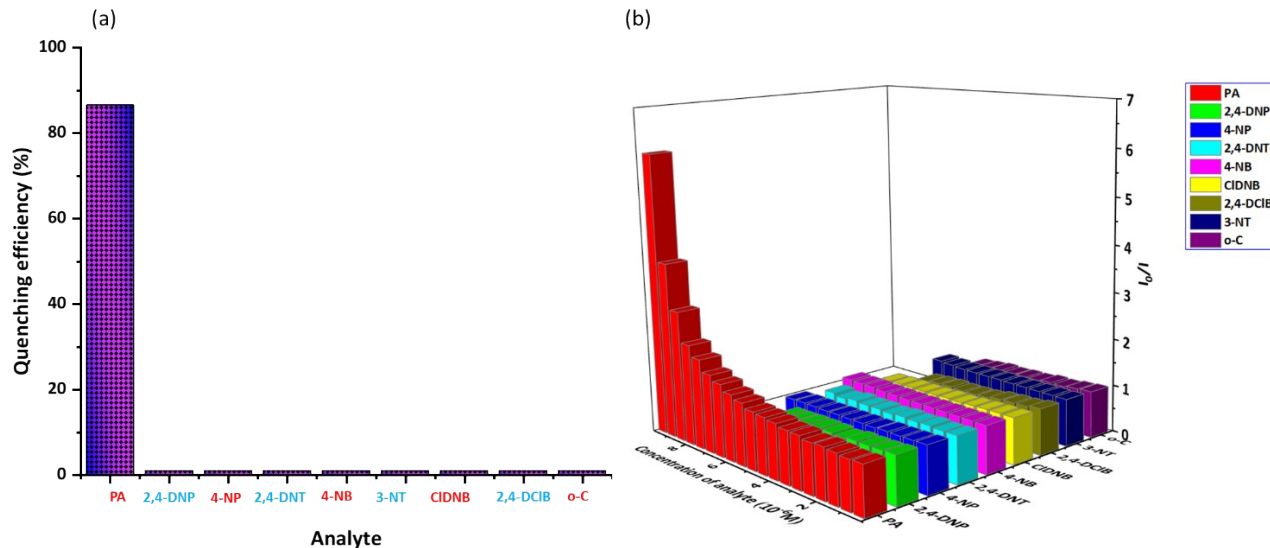

**Figure S13.** (a) Fluorescence quenching percentages of  $1(\text{DMF})_4$  (in DMSO) in presence of different aromatic compounds; (b) S-V plot of  $1(\text{DMF})_4$  (in DMSO) in presence of different aromatic compounds.

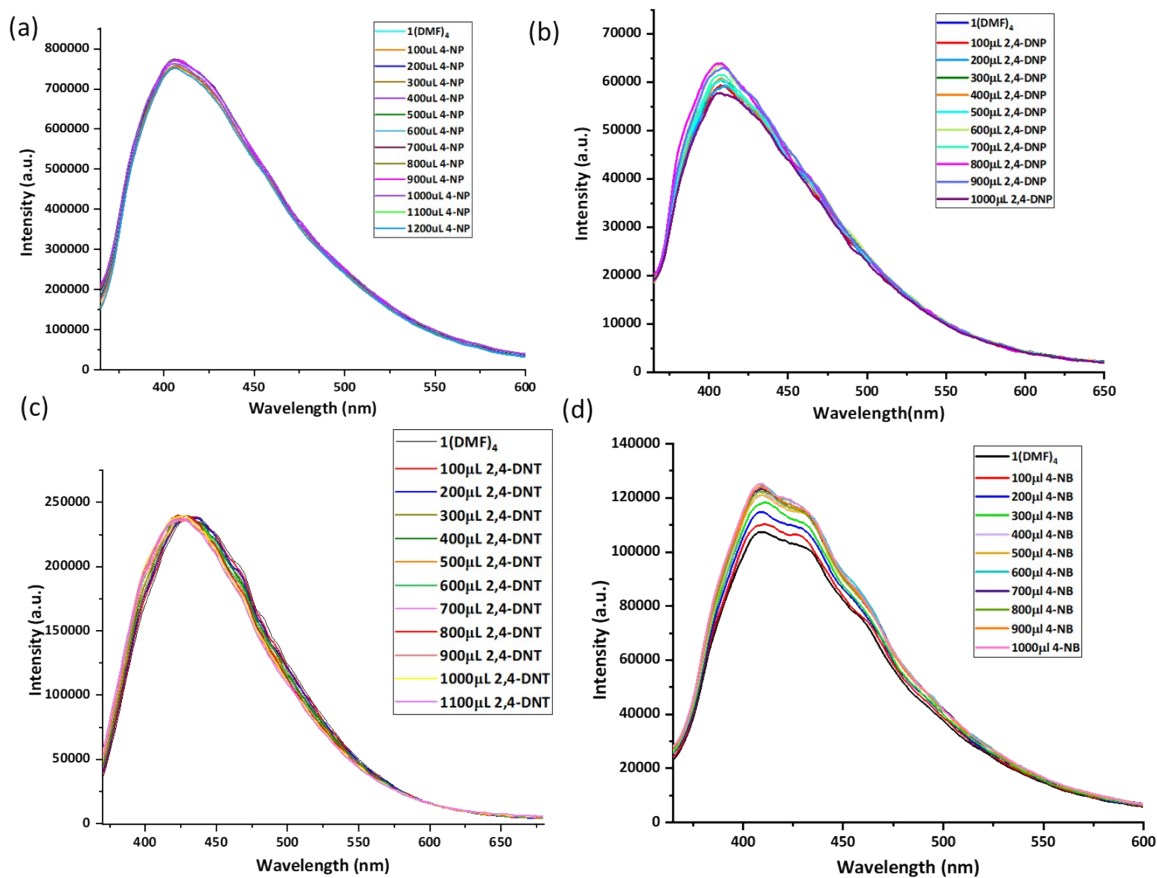

**Figure S14.** Fluorescence quenching titrations of  $1(\text{DMF})_4$  in DMSO with (a) 4-NP; (b) 2,4-DNP; (c) 2,4-DNT; (d) 4-NB.

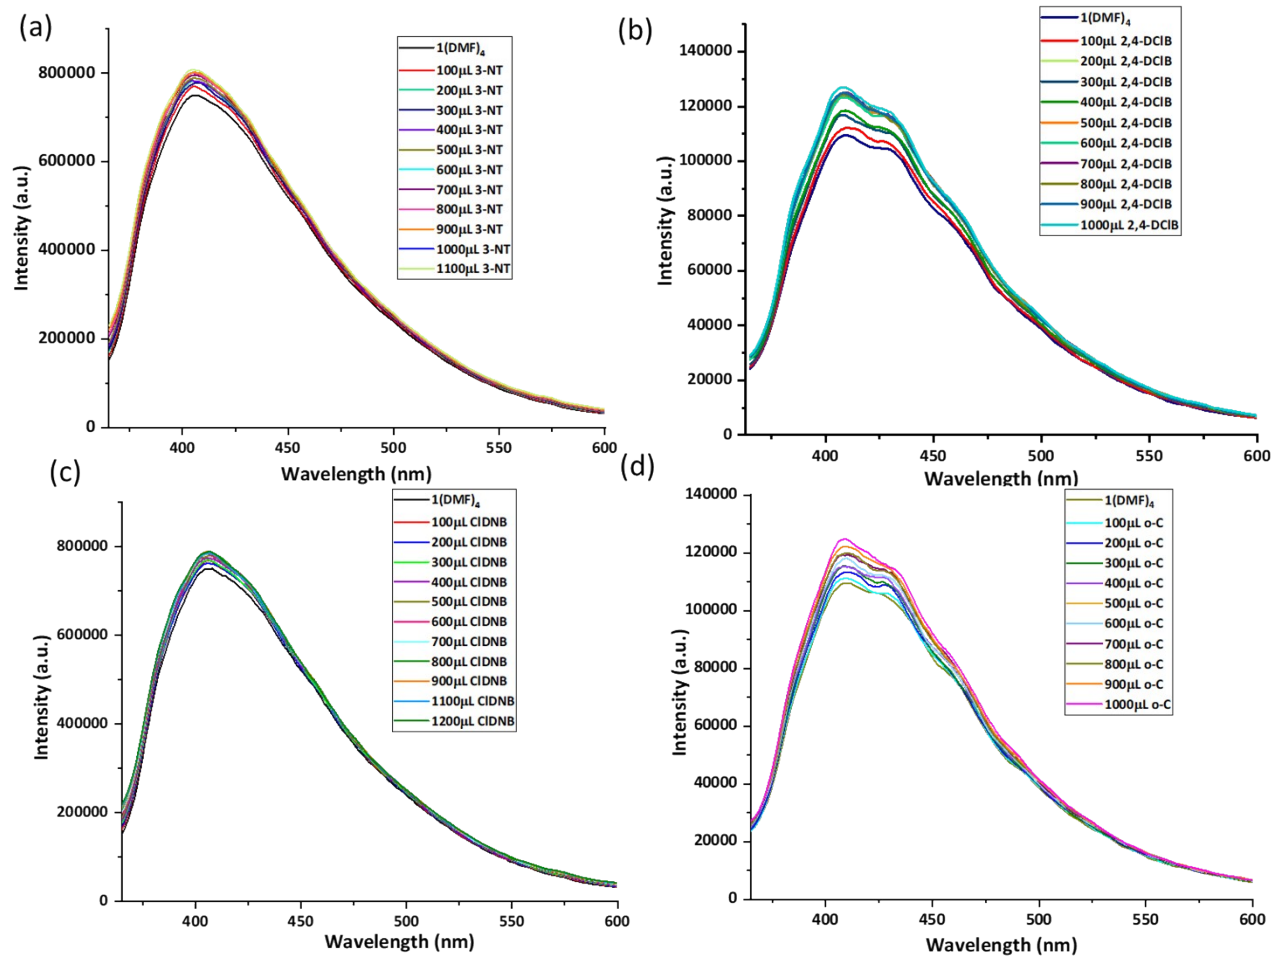

Figure S15. Fluorescence quenching titrations of  $1(\text{DMF})_4$  in DMSO with (a) 3-NT; (b) 2,4-DCIB (c) CIDNB (d) o-C.

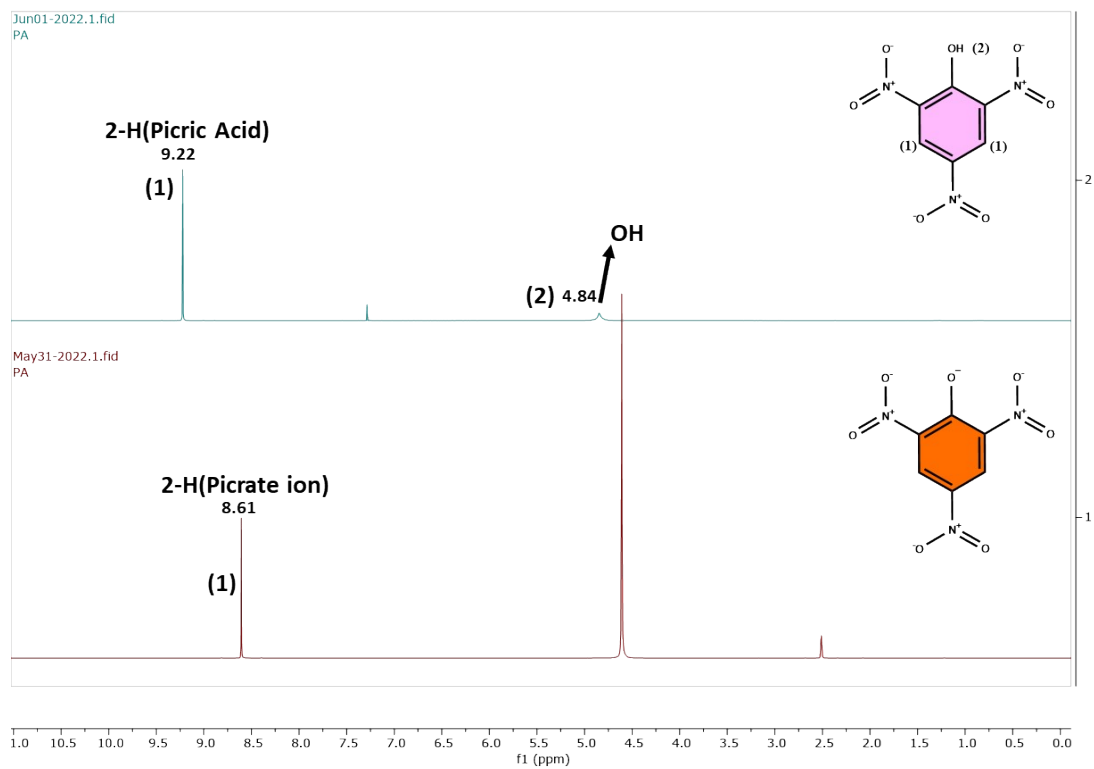

Figure S16.  $^1\text{H-NMR}$  of PA in  $\text{CDCl}_3$  and in  $\text{DMSO-d}_6$ .

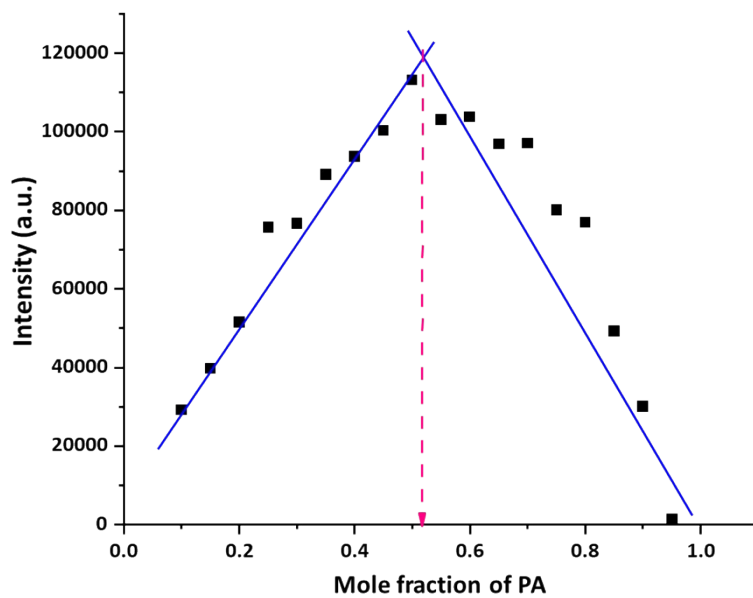

Figure S17. Jobs plot for estimating the binding ratio of  $1(\text{DMF})_4$  and PA in  $\text{DMSO}$ .

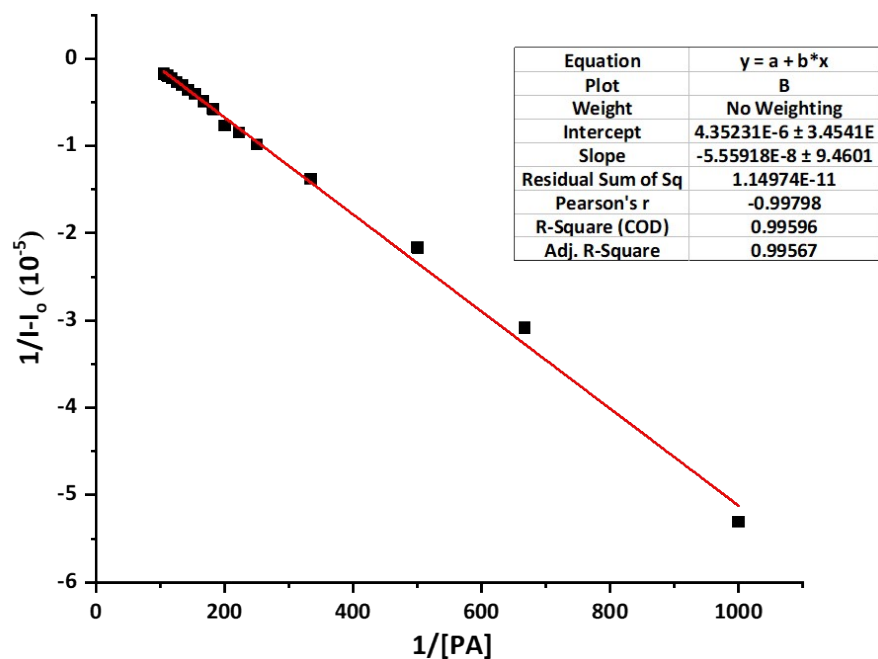

Figure S18. Benesi-Hildebrand (B-H) plot for determination of binding constant of **1(DMF)<sub>4</sub>** and PA in DMSO.

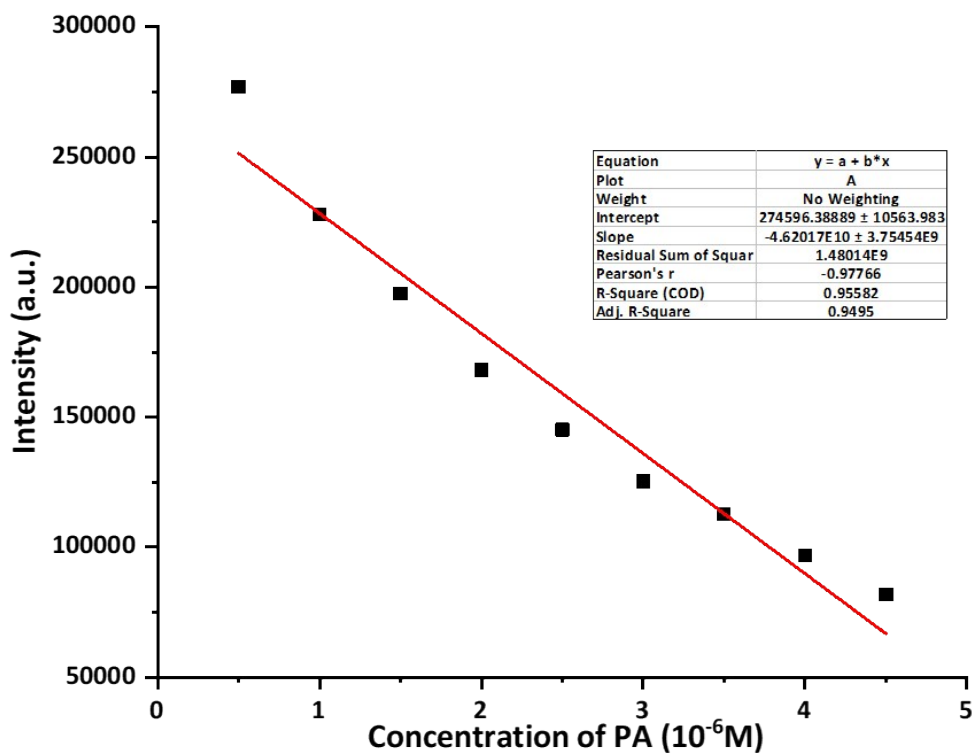

Figure S19. Plot of fluorescense intensity at 410 nm Vs. concentration of PA in DMSO ( $\sigma = 1.054$ ).

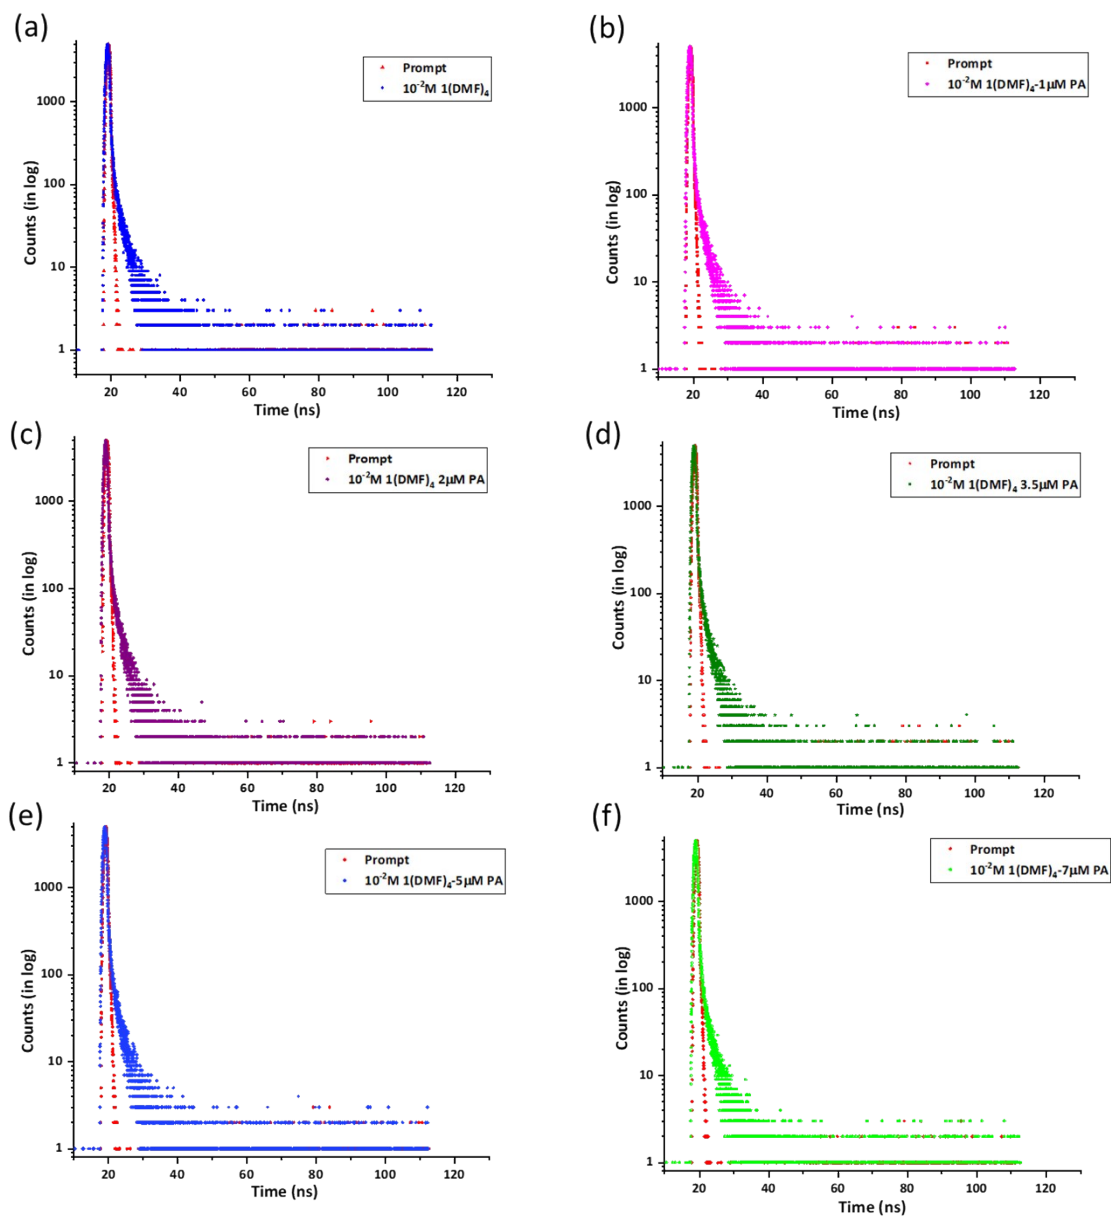

**Figure S20.** Time-resolved fluorescence decay profiles (Excitation wavelength = 350nm) in DMSO: (a)  $1(\text{DMF})_4$  (Concentration =  $10^{-2}\text{M}$ ); (b)  $1(\text{DMF})_4$  (Concentration =  $10^{-2}\text{M}$ ) and PA (Concentration =  $1\mu\text{M}$ ); (c)  $1(\text{DMF})_4$  (Concentration =  $10^{-2}\text{M}$ ) and PA (Concentration =  $2\mu\text{M}$ ); (d)  $1(\text{DMF})_4$  (Concentration =  $10^{-2}\text{M}$ ) and PA (Concentration =  $3.5\mu\text{M}$ ); (e)  $1(\text{DMF})_4$  (Concentration =  $10^{-2}\text{M}$ ) and PA (Concentration =  $5\mu\text{M}$ ); (f)  $1(\text{DMF})_4$  (Concentration =  $10^{-2}\text{M}$ ) and PA (Concentration =  $7\mu\text{M}$ ).



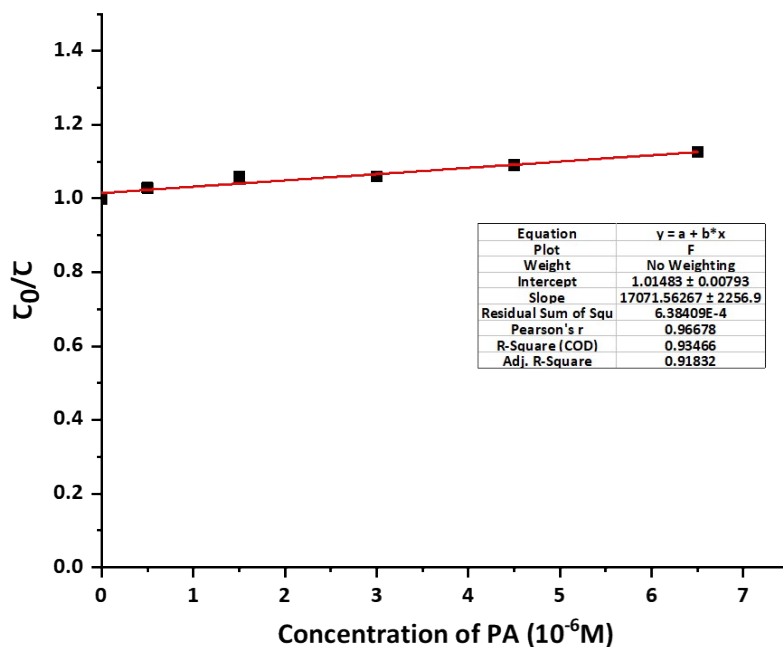

**Figure S21.** Plot of  $\tau_0/\tau$  Vs. Concentration of PA (Analyte/Quencher); The plot verifies the presence of static quenching.

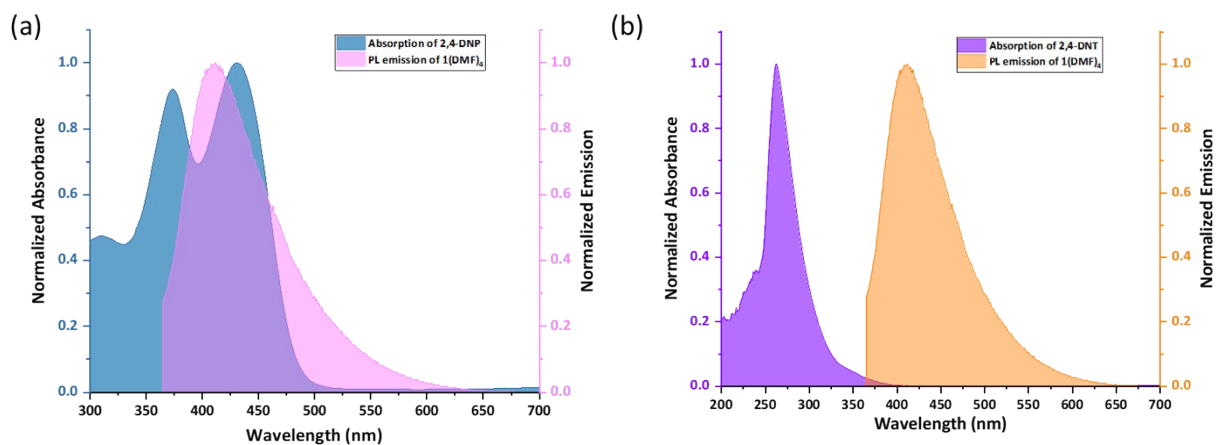

**Figure S22.** Overlap of emission spectrum of  $1(\text{DMF})_4$  in DMSO with absorption spectrum of (a) 2,4-DNP (Overlap integral of  $1(\text{DMF})_4$  and 2,4-DNP  $J(\lambda) = 7.37 \times 10^{14} \text{ M}^{-1}\text{cm}^{-1}\text{nm}^4$ ,  $R_0 = 18.85 \text{ \AA}$ ) (b) 2,4-DNT (Overlap integral of  $1(\text{DMF})_4$  and  $J(\lambda) = 2.92 \times 10^{12} \text{ M}^{-1}\text{cm}^{-1}\text{nm}^4$ ,  $R_0 = 7.50 \text{ \AA}$ ).

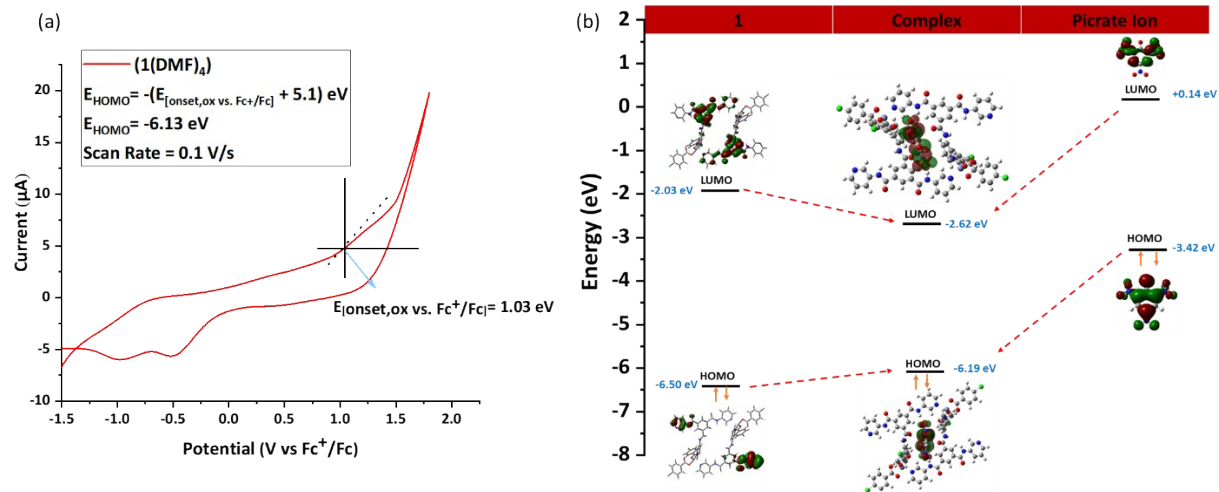

**Figure S23** (a) Cyclic voltametric analysis of **1**(DMF)<sub>4</sub> in DMSO (10<sup>-3</sup>M); (b) HOMO and LUMO energies for **1** (in DMSO) and picrate ion estimated from DFT.

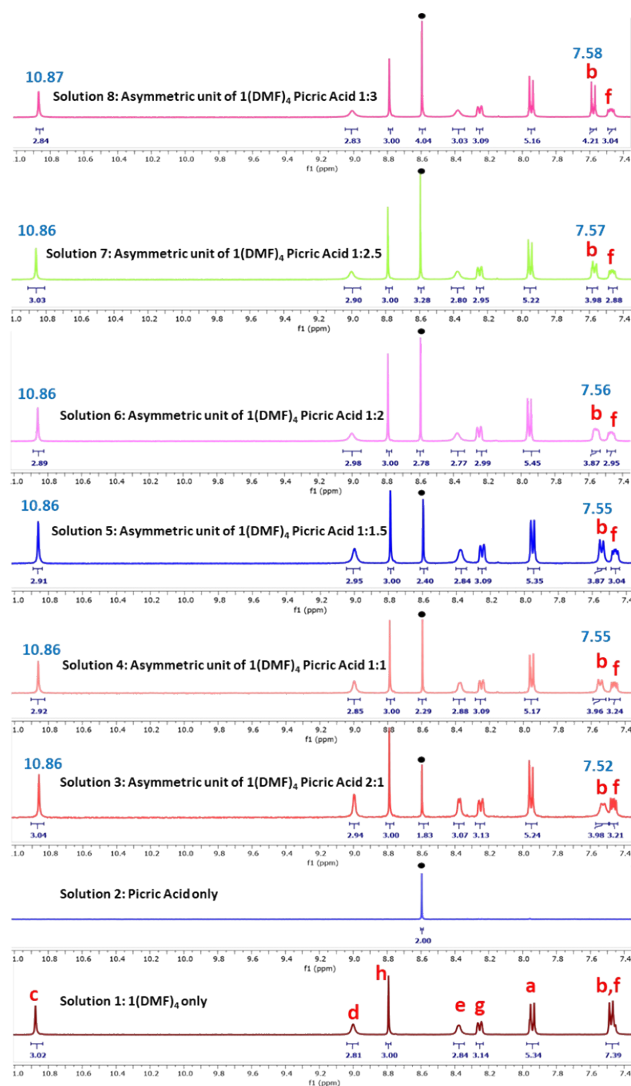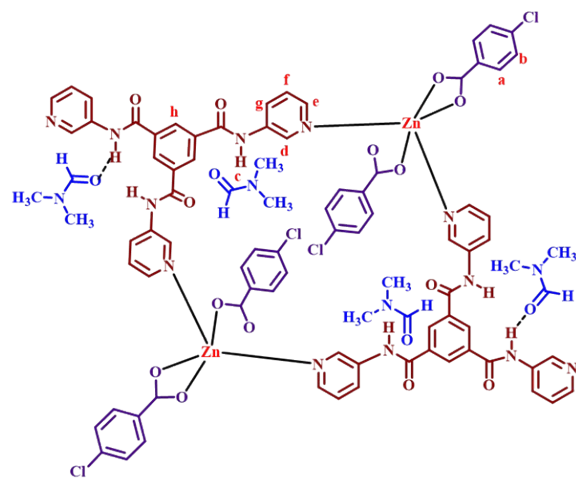

**Figure S24.**  $^1\text{H-NMR}$  spectra of different ratio of  $1(\text{DMF})_4$  (14.59 mM in  $\text{DMSO-d}_6$ ) and PA (14.59 mM in  $\text{DMSO-d}_6$ ): Solution 1: 0.10 mL of  $1(\text{DMF})_4$  + 0.30 mL of  $\text{DMSO-d}_6$ ; Solution 2: 0.1 mL of PA + 0.3 mL of  $\text{DMSO-d}_6$ ; Solution 3: 0.1 mL of  $1(\text{DMF})_4$  + 0.05 mL of PA + 0.25 mL of  $\text{DMSO-d}_6$ ; Solution 4: 0.1 mL of  $1(\text{DMF})_4$  + 0.1 mL of PA + 0.2 mL of  $\text{DMSO-d}_6$ ; Solution 5: 0.1 mL of  $1(\text{DMF})_4$  + 0.15 mL of PA + 0.15 mL of  $\text{DMSO-d}_6$ ; Solution 6: 0.1 mL of  $1(\text{DMF})_4$  + 0.2 mL of PA + 0.1 mL of  $\text{DMSO-d}_6$ ; Solution 7: 0.1 mL of  $1(\text{DMF})_4$  + 0.25 mL of PA + 0.05 mL of  $\text{DMSO-d}_6$ ; Solution 8: 0.1 mL of  $1(\text{DMF})_4$  + 0.3 mL of PA. (Ratio of asymmetric unit of  $1(\text{DMF})_4$ : PA is mentioned in each spectrum); (Concentration of  $1(\text{DMF})_4$  is calculated by taking its asymmetric unit, molecular weight of 961.11; Note that PA in  $\text{DMSO}$  gets deprotonated to form picrate anion).

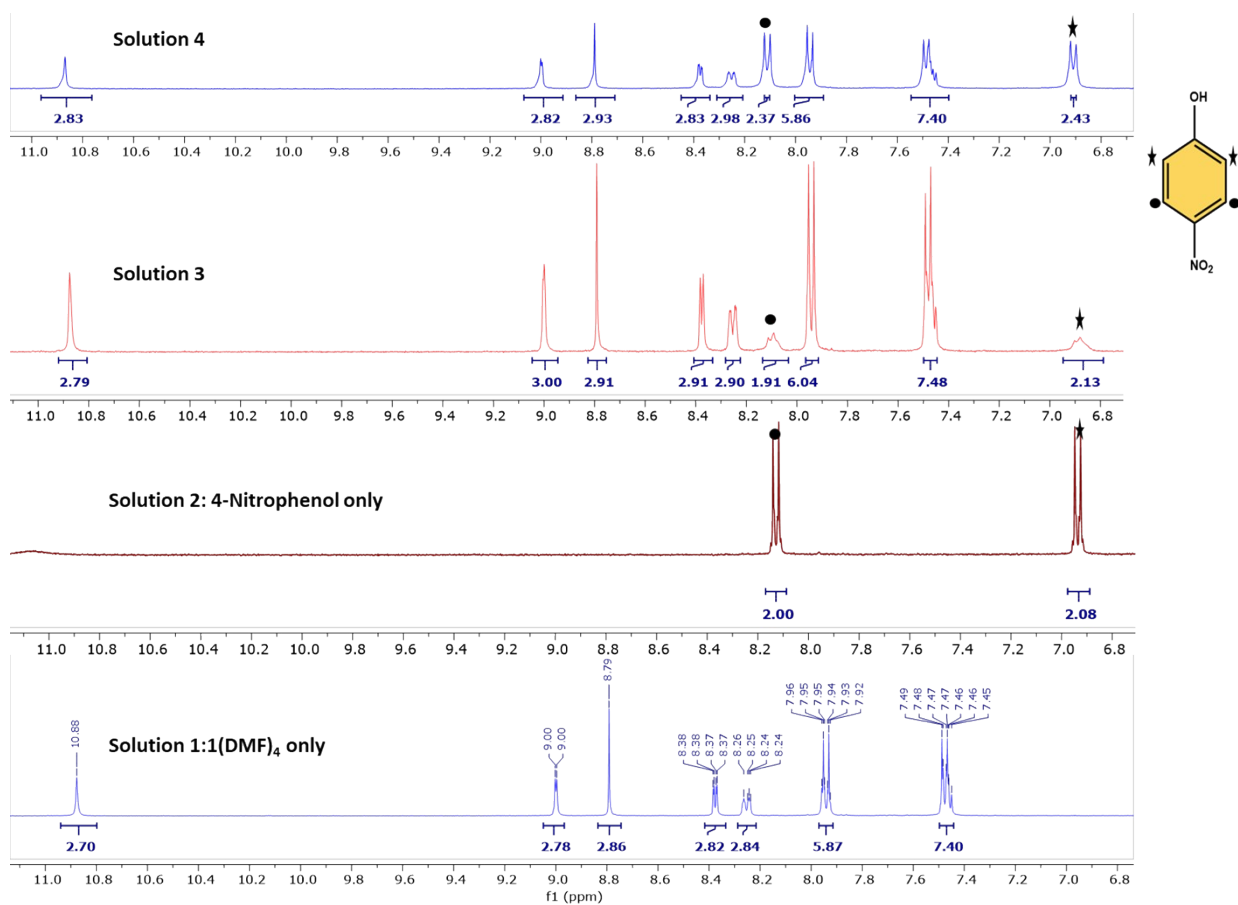

**Figure S25.**  $^1\text{H-NMR}$  spectra of  $1(\text{DMF})_4$  in  $\text{DMSO-d}_6$  in presence of 4-NP: Solution 1: only  $1(\text{DMF})_4$  (0.10 mL of 14.59 mM in  $\text{DMSO-d}_6$ ) + 0.30 mL of  $\text{DMSO-d}_6$ ; Solution 2: 4-NP (0.10 mL of 14.59 mM in  $\text{DMSO-d}_6$ ) + 0.30 mL of  $\text{DMSO-d}_6$ ; Solution 3:  $1(\text{DMF})_4$  (0.10 mL of 14.59 mM in  $\text{DMSO-d}_6$ ) + NP (0.05 mL of 14.59 mM in  $\text{DMSO-d}_6$ ) + 0.25 mL of  $\text{DMSO-d}_6$ ; Solution 4:  $1(\text{DMF})_4$  (0.10 mL of 14.59 mM in  $\text{DMSO-d}_6$ ) + NP (0.25 mL of 14.59 mM in  $\text{DMSO-d}_6$ ) + 0.05 mL of  $\text{DMSO-d}_6$ . (Concentration of  $1(\text{DMF})_4$  is calculated by taking its asymmetric unit, molecular weight of 961.11).

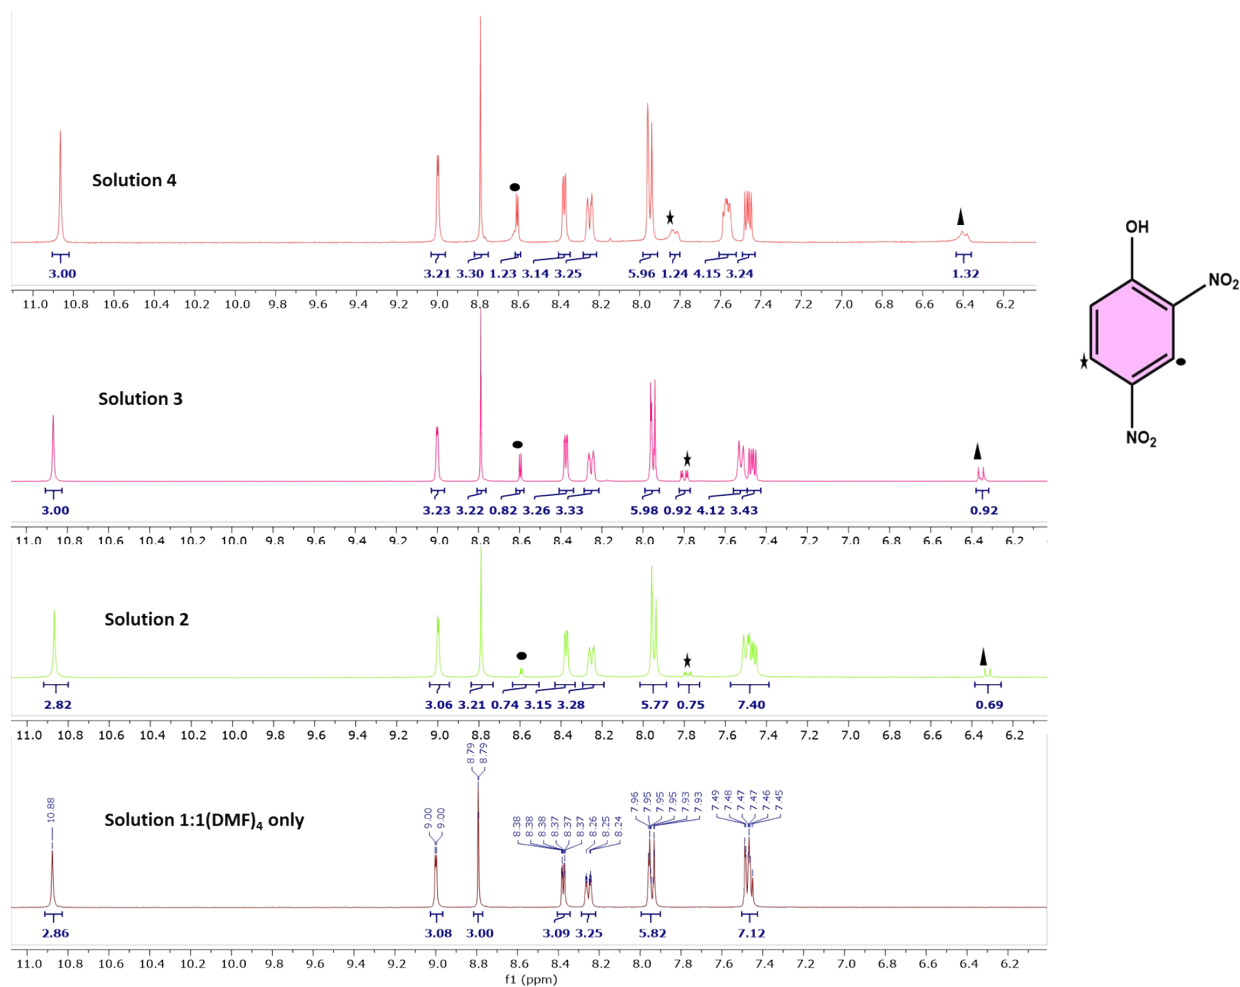

**Figure S26.** <sup>1</sup>H-NMR spectra of **1(DMF)<sub>4</sub>** in DMSO-d<sub>6</sub> in presence of 2,4-DNP: Solution 1: only **1(DMF)<sub>4</sub>** (0.10 mL of 14.59 mM in DMSO-d<sub>6</sub>) + 0.30 mL of DMSO-d<sub>6</sub>; Solution 2: **1(DMF)<sub>4</sub>** (0.10 mL of 14.59 mM in DMSO-d<sub>6</sub>) + 2,4-DNP (0.05 mL of 14.59 mM in DMSO-d<sub>6</sub>) + 0.25 mL of DMSO-d<sub>6</sub>; Solution 3: **1(DMF)<sub>4</sub>** (0.10 mL of 14.59 mM in DMSO-d<sub>6</sub>) + 2,4-DNP (0.15 mL of 14.59 mM in DMSO-d<sub>6</sub>) + 0.15 mL of DMSO-d<sub>6</sub>; Solution 4: **1(DMF)<sub>4</sub>** (0.10 mL of 14.59 mM in DMSO-d<sub>6</sub>) + 2,4-DNP (0.25 mL of 14.59 mM in DMSO-d<sub>6</sub>) + 0.05 mL of DMSO-d<sub>6</sub>. (Concentration of **1(DMF)<sub>4</sub>** is calculated by taking its asymmetric unit, molecular weight of 961.11).

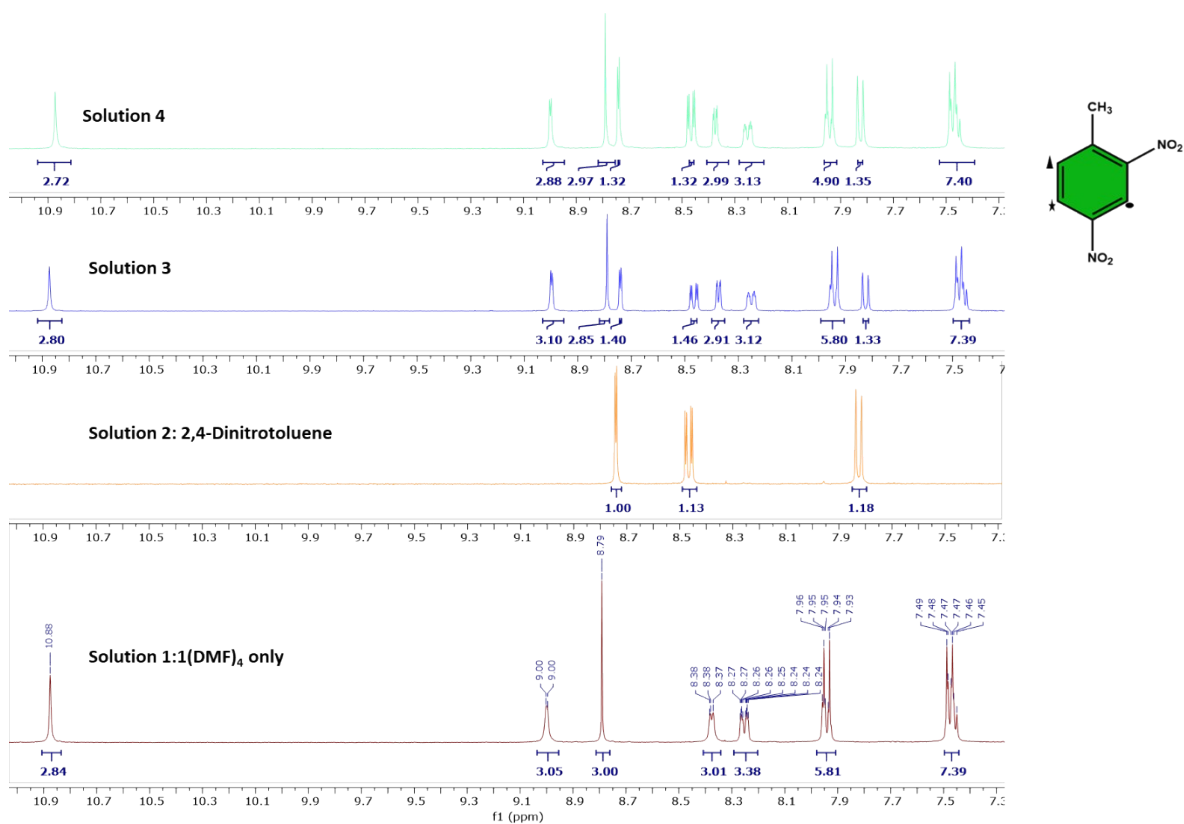

**Figure S27.**  $^1\text{H-NMR}$  spectra of  $\mathbf{1}(\text{DMF})_4$  in  $\text{DMSO-d}_6$  in presence of 2,4-DNT: Solution 1: only  $\mathbf{1}(\text{DMF})_4$  (0.10 mL of 14.59 mM in  $\text{DMSO-d}_6$ ) + 0.30 mL of  $\text{DMSO-d}_6$ ; Solution 2: only DNT (0.10 mL of 14.59 mM in  $\text{DMSO-d}_6$ ) + 0.30 mL of  $\text{DMSO-d}_6$ ; Solution 3:  $\mathbf{1}(\text{DMF})_4$  (0.10 mL of 14.59 mM in  $\text{DMSO-d}_6$ ) + 2,4-DNT (0.20 mL of 14.59 mM in  $\text{DMSO-d}_6$ ) + 0.10 mL of  $\text{DMSO-d}_6$ ; Solution 4:  $\mathbf{1}(\text{DMF})_4$  (0.10 mL of 14.59 mM in  $\text{DMSO-d}_6$ ) + 2,4-DNT (0.30 mL of 14.59 mM in  $\text{DMSO-d}_6$ ). (Concentration of  $\mathbf{1}(\text{DMF})_4$  is calculated by taking its asymmetric unit, molecular weight of 961.11).

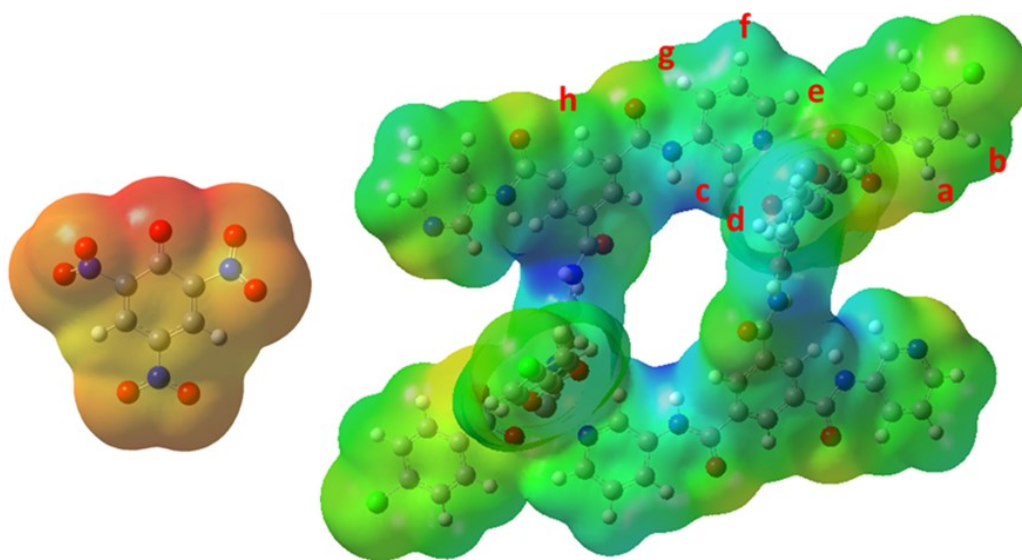

**Figure S28.** Electrostatic surface potentials of **1** (optimized in DMSO) and picrate which resulted in shifts in the peak position of N-Hc and Hb in  $^1\text{H-NMR}$ .

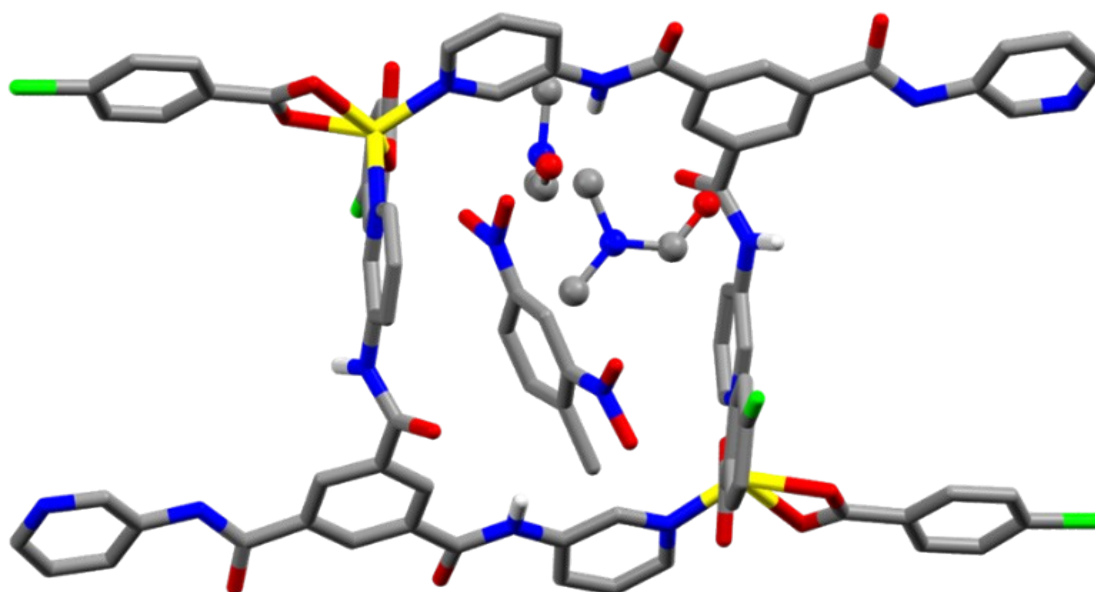

**Figure S29.** Molecular docking structure of **1(DMF)<sub>4</sub>** and 2,4-DNT (DFT optimized geometry of the probe (in DMSO) and analyte were considered for docking studies).

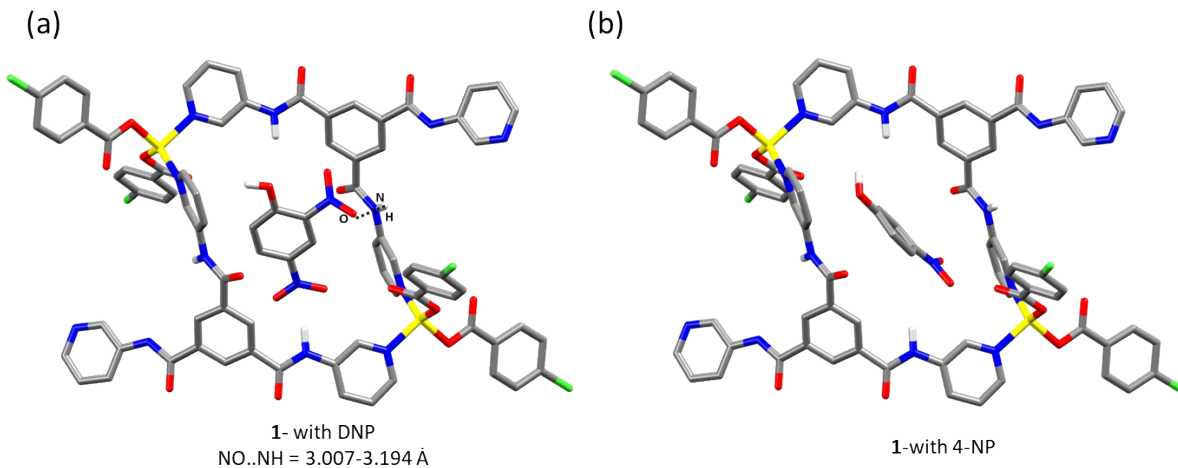

**Figure S30.** Molecular docking structure of **1** and other nitroaromatic compounds (2,4-DNP and 4-NP) (For the hydrogen bond interactions, the distances between the heteroatoms are mentioned, Interaction energy  $E = -176.1$  kcal/mol between the **1**-in DMSO and 2,4-DNP). (Optimized geometry of the probe (in DMSO) and analyte were considered for docking studies).

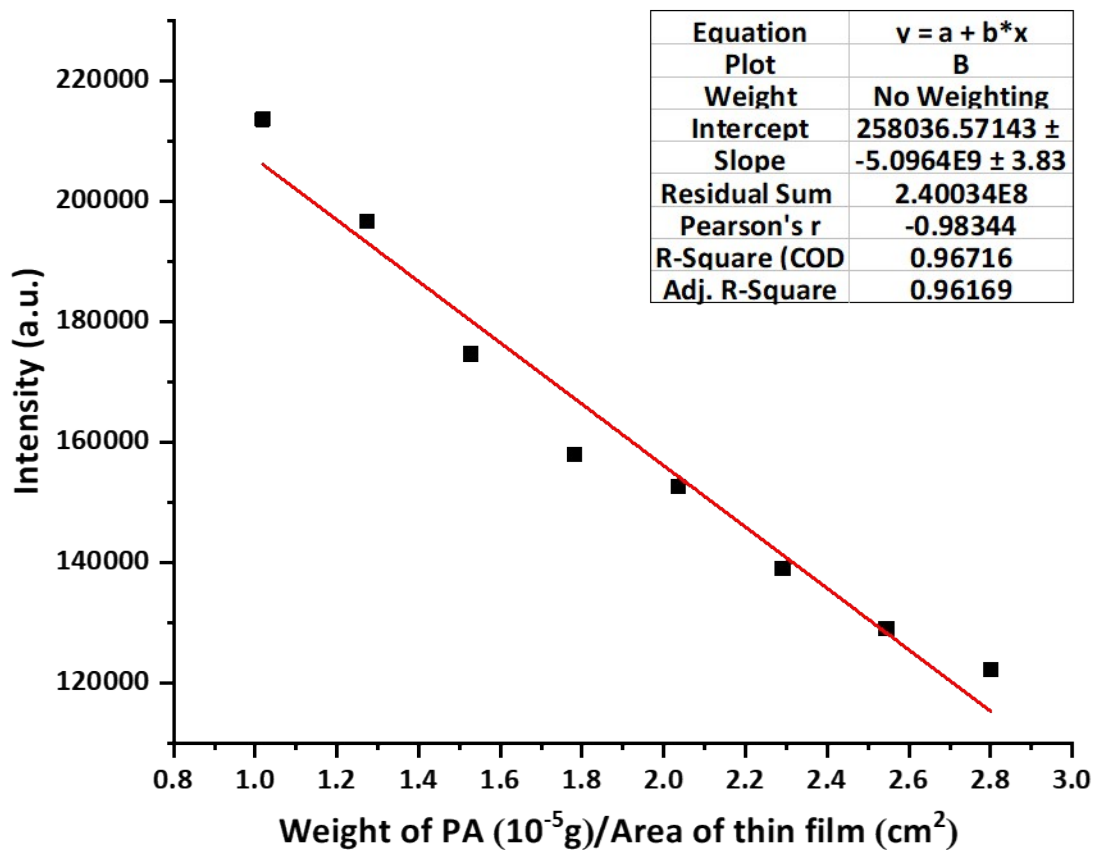

**Figure S31.** Plot of fluorescence intensity at 430 nm Vs. Weight of PA/Area of thin film on thin films of **1(DMF)<sub>4</sub>** ( $\sigma = 0.8388$ ).



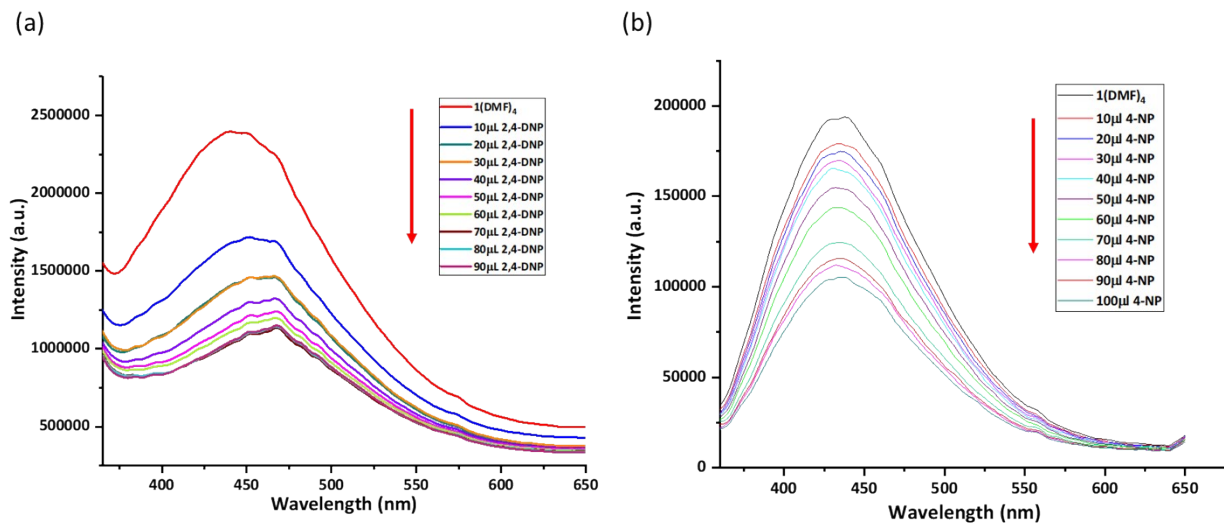

Figure S32. Fluorescence quenching titrations of thin films of  $1(\text{DMF})_4$  with (a) 2,4-DNP and (b) 4-NP.

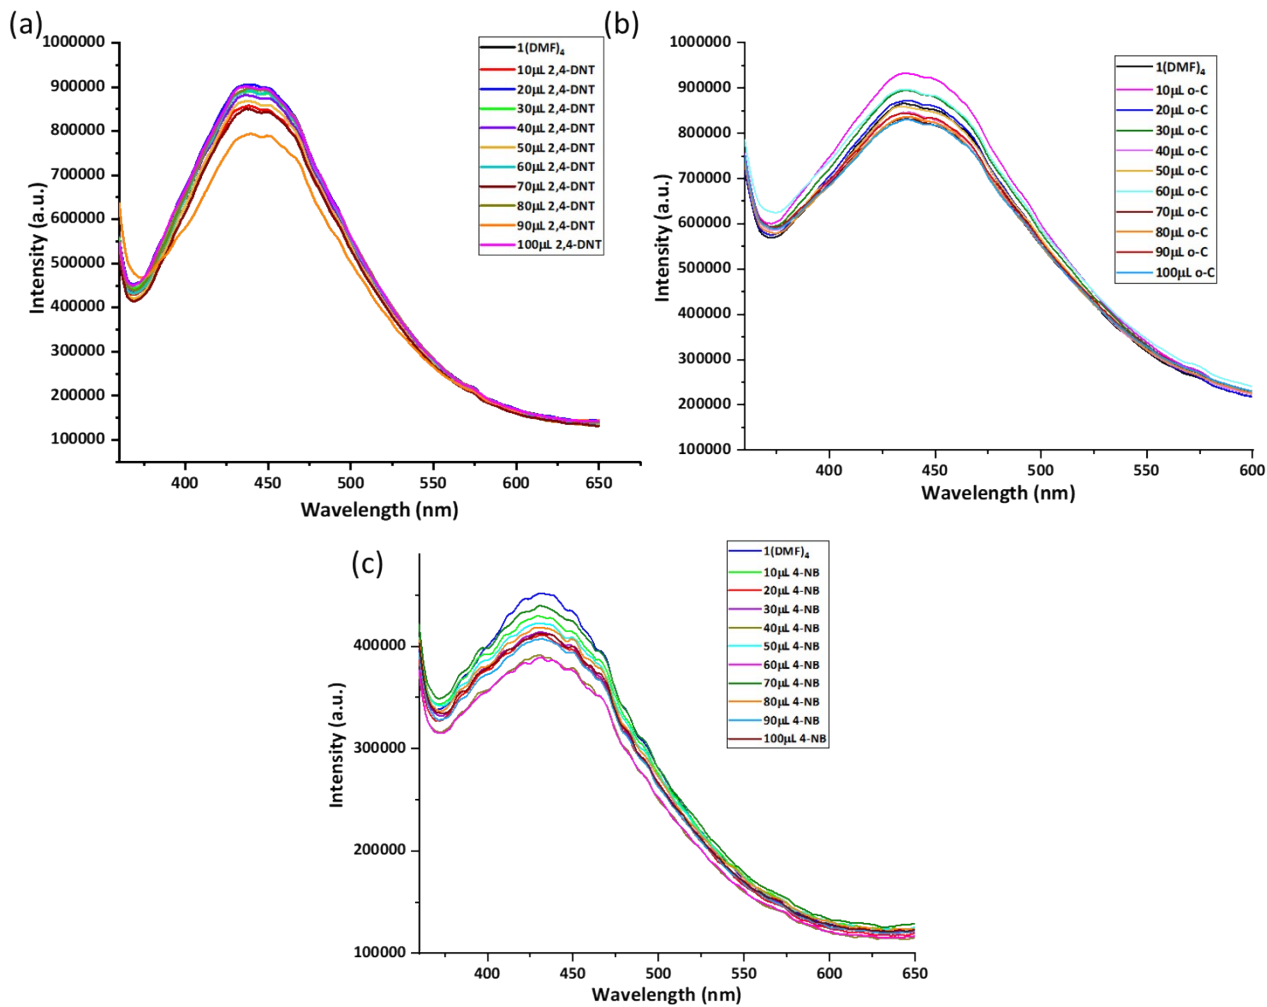

Figure S33. Fluorescence quenching titrations of thin films of  $1(\text{DMF})_4$  with (a) 2,4-DNT and (b) o-C (c) 4-NB.

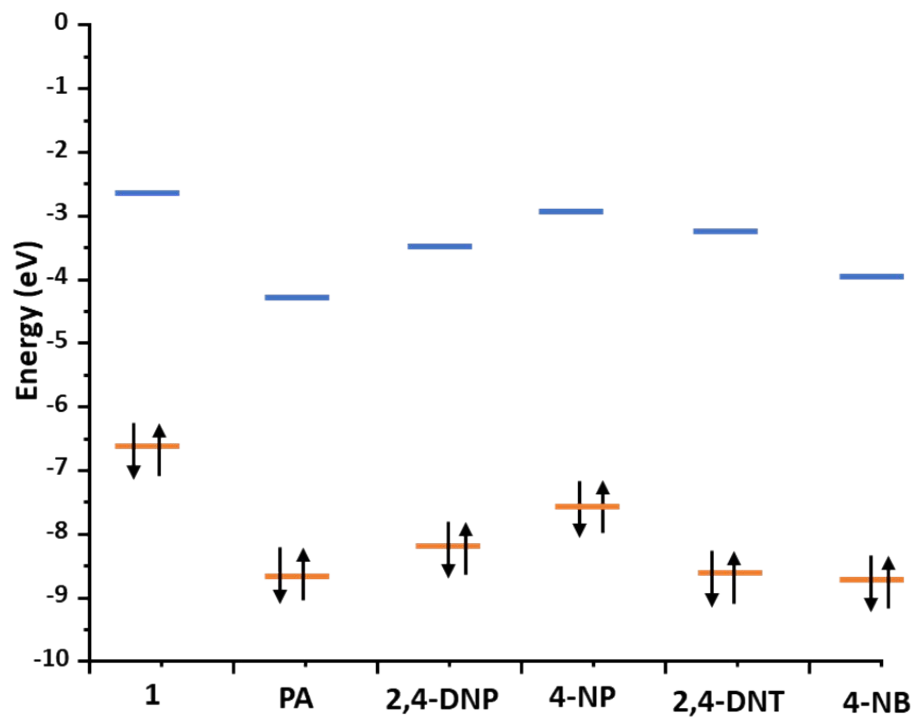

**Figure S34.** Frontier orbital diagrams of **1** and aromatic compounds PA, 2,4-DNP, 4-NP, 2,4- DNT, 4-NB.

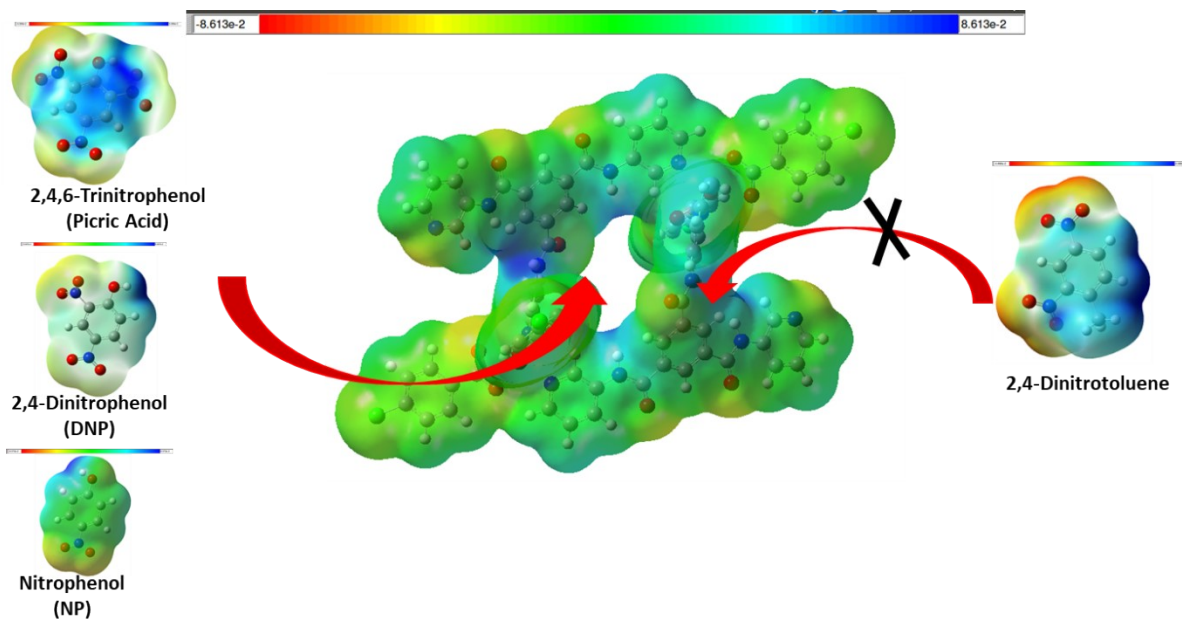

**Figure S35.** Electrostatic potential surfaces of **1** and aromatic compounds (Generated using the optimized geometry of **1**, where solvated DMF are removed before performing the optimization).

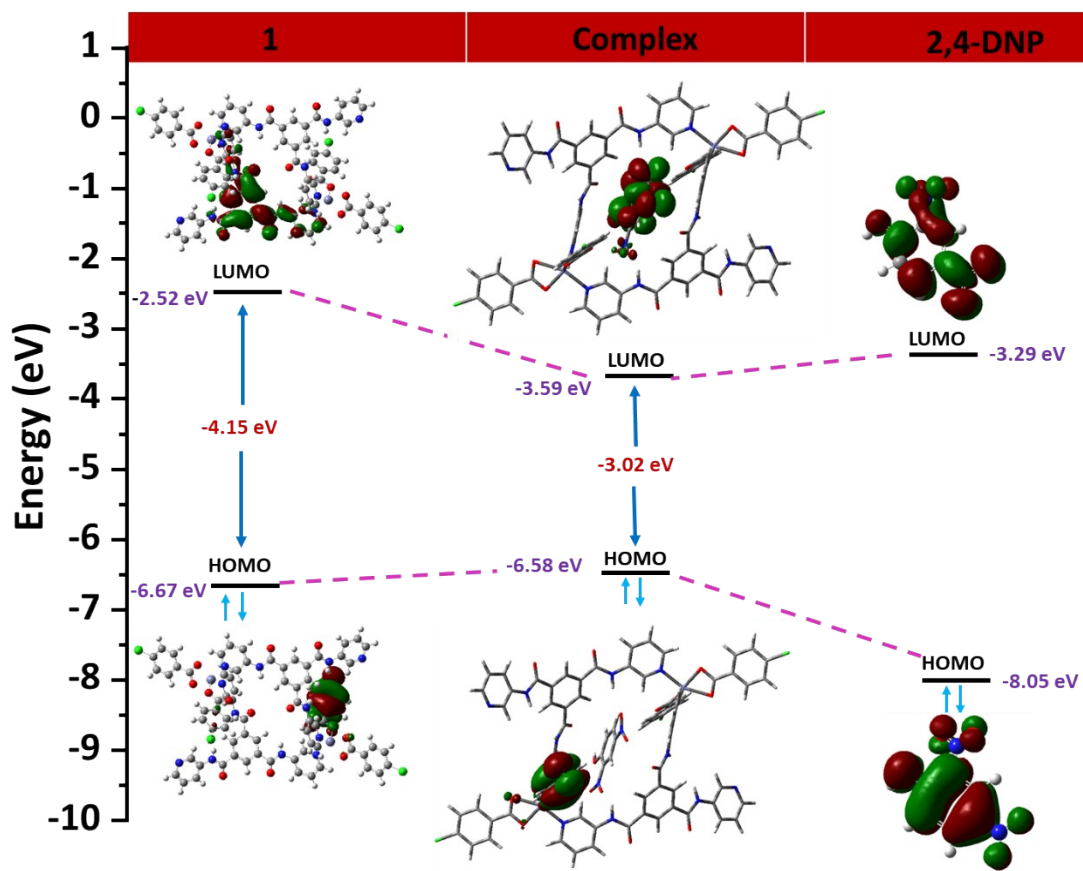

Figure S36. HOMO and LUMO energies for **1** and 2,4-DNP estimated from DFT.

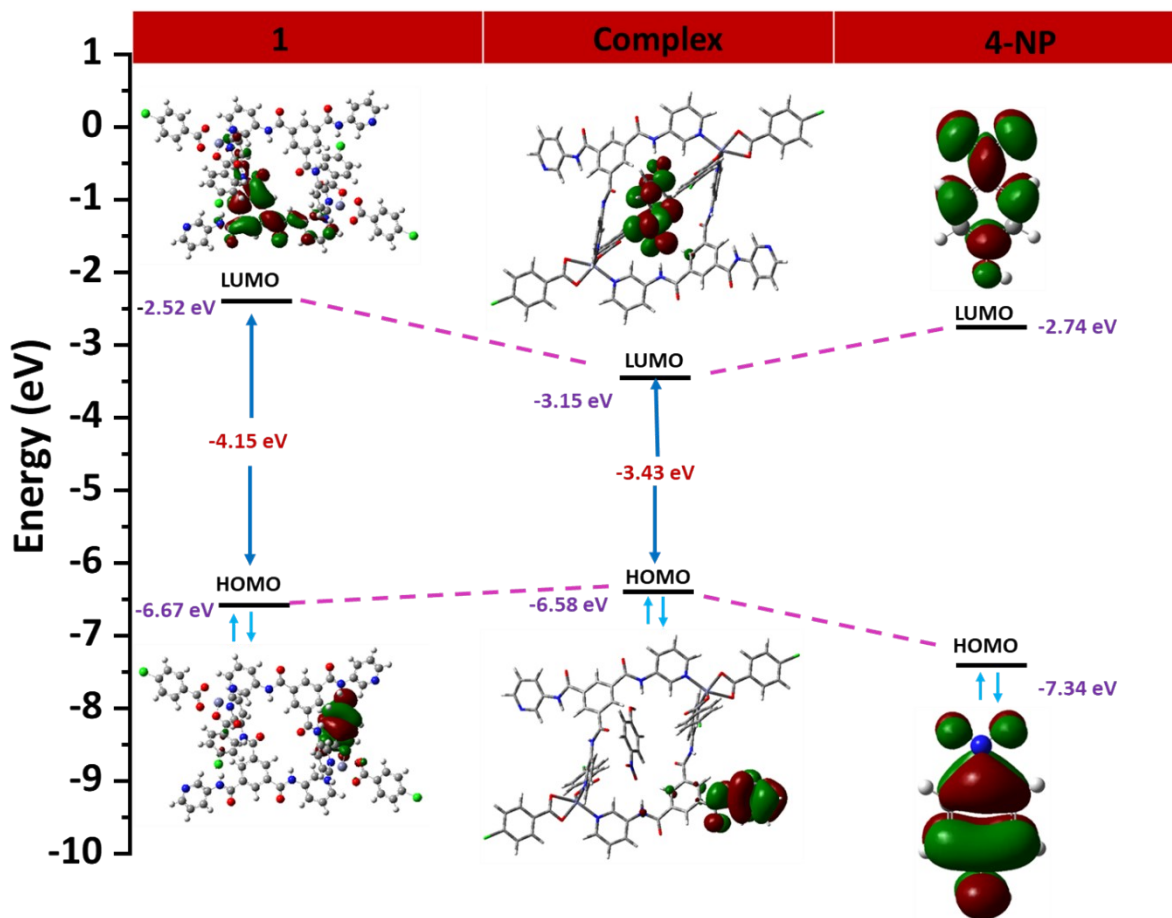

Figure S37. HOMO and LUMO energies for **1** and 4-NP estimated from DFT.

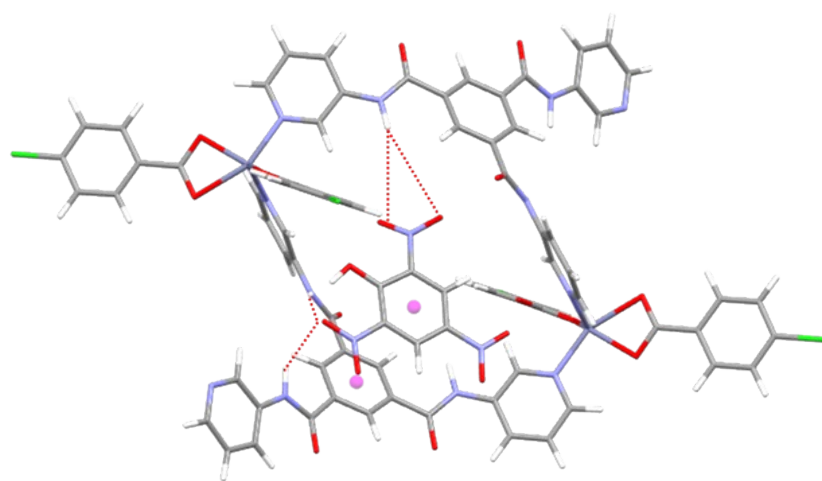

Figure S38. Molecular docking structure of **1** (optimised file of **1** with DFT is used) with PA.

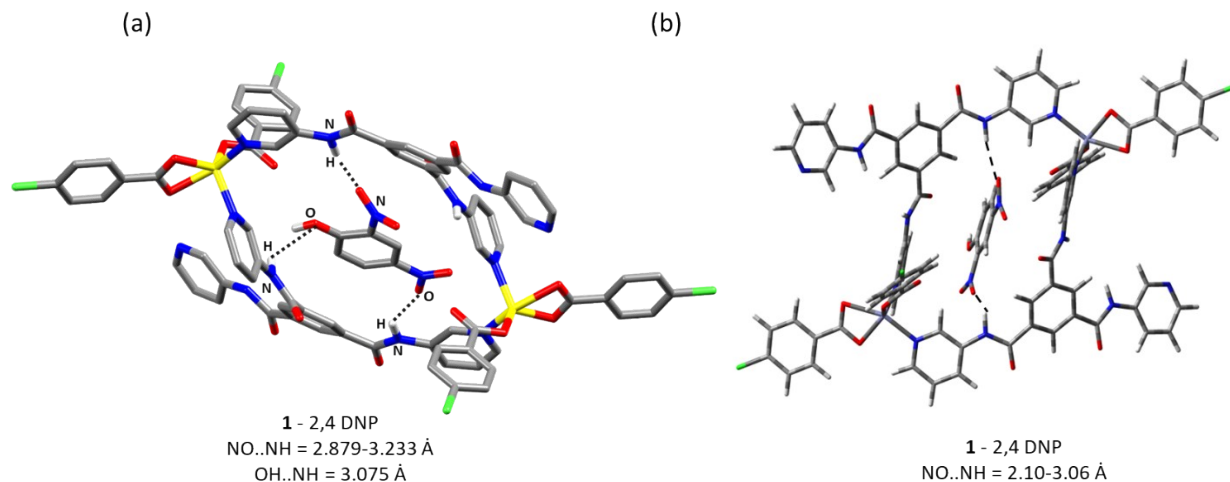

**Figure S39.** (a) Molecular docking structure of **1** (Optimized file of **1** by DFT is used) and 2,4-DNP; Interaction energy  $E = -185.1$  kcal/mol; (b) Optimized Geometry of 1-2,4-DNP along with possible interactions (dotted black line) obtained by DFT; Interaction energy =  $-120.51$  kcal/mol (For the hydrogen bond interactions, the distances between the heteroatoms are mentioned,  $E$  is the energy of interaction between the probe and the analyte).

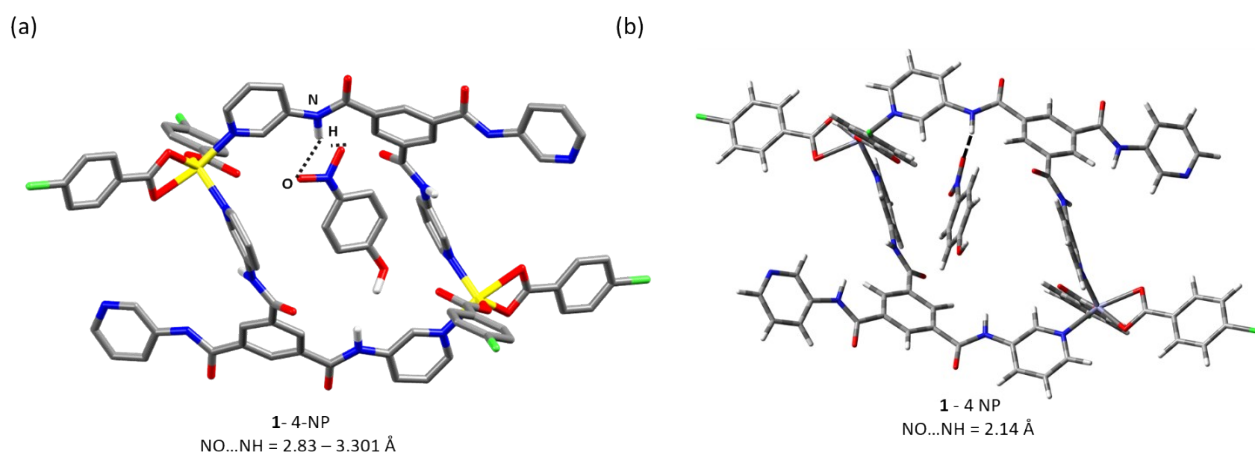

**Figure S40.** (a) Molecular docking structure of **1** (Optimized file of **1** by DFT is used) and 4-NP; Interaction energy  $E = -150.6$  kcal/mol; (b) Optimized Geometry of 1-4-NP along with possible interactions (dotted black line) obtained by DFT; Interaction energy  $E = -80.09$  kcal/mol (For the hydrogen bond interactions, the distances between the heteroatoms are mentioned,  $E$  is the energy of interaction between the probe and the analyte).

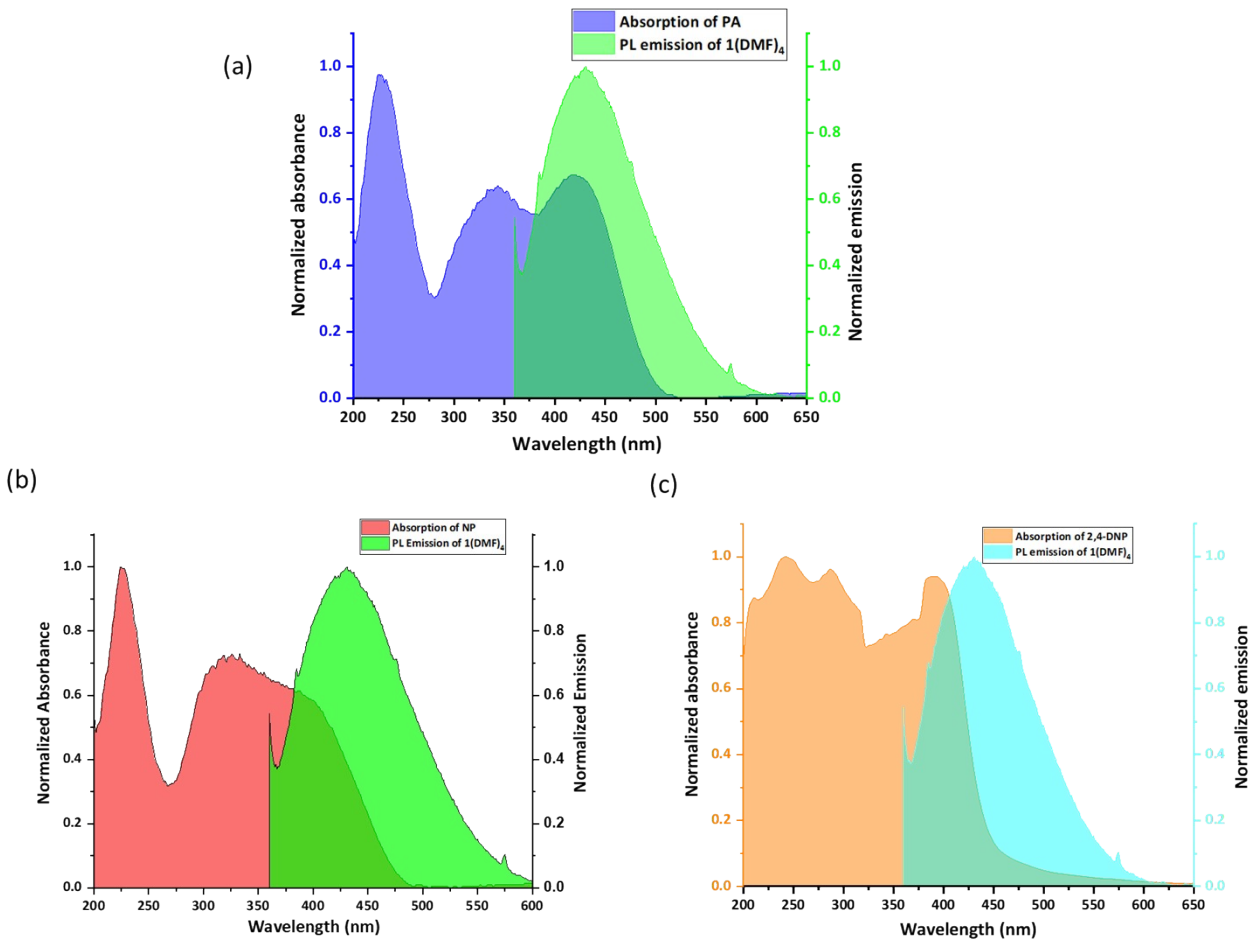

**Figure S41.** Overlap of emission spectra of  $1(\text{DMF})_4$  in solid state with absorption spectrum of (a) PA (b) 4-NP (c) 2,4-DNP.

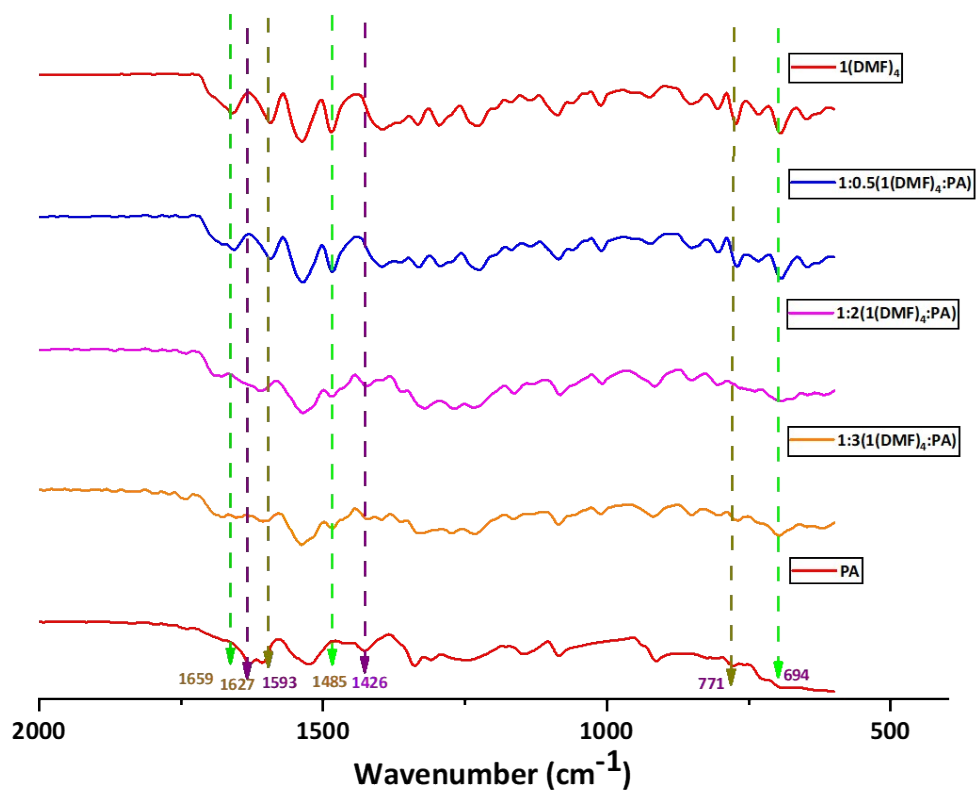

**Figure S42.** Comparison of IR spectra of  $1(\text{DMF})_4$  in presence of different amount of PA: (a)  $1(\text{DMF})_4$  only, (b)  $1(\text{DMF})_4$ : PA = 1:0.5; (c)  $1(\text{DMF})_4$ : PA = 1:2; (d)  $1(\text{DMF})_4$ : PA = 1:3; (e) PA only; Note that for  $1(\text{DMF})_4$ , asymmetric unit of  $1(\text{DMF})_4$  is considered for calculating the ratio. (Notice the appearance of peaks corresponding to PA (some of the peaks are  $1627\text{cm}^{-1}$ ,  $1426\text{cm}^{-1}$ ) as the ratio of picric acid increases, while the original peaks of  $1(\text{DMF})_4$  (some of the peaks are  $694\text{cm}^{-1}$ ,  $1435\text{cm}^{-1}$ ,  $1593\text{cm}^{-1}$ ,  $1659\text{cm}^{-1}$ ) are retained).

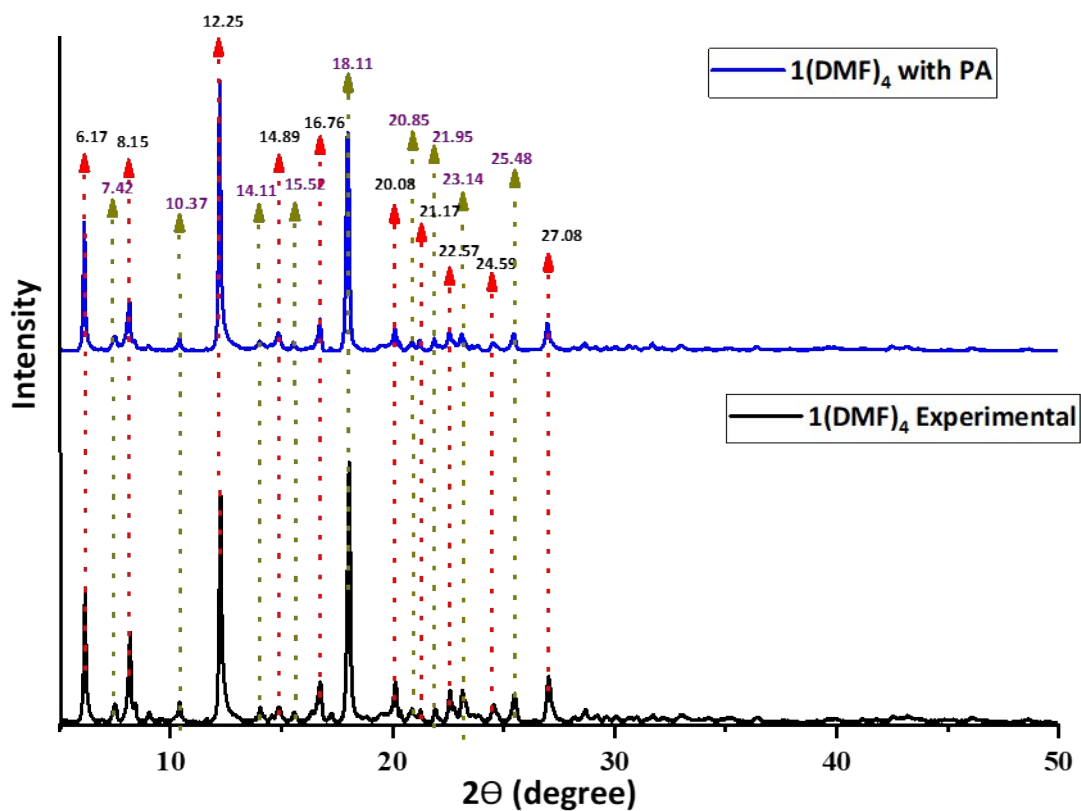

Figure S43. PXRD of  $1(\text{DMF})_4$ : Experimental (a)  $1(\text{DMF})_4$  and PA (b)  $1(\text{DMF})_4$  experimental.

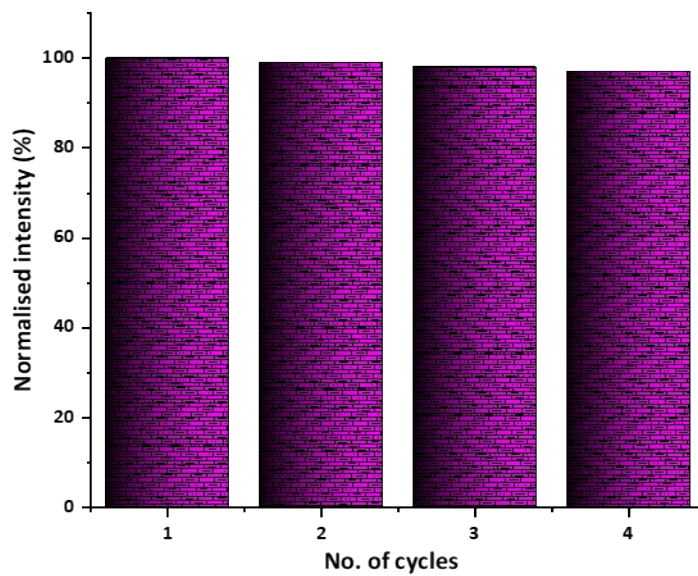

Figure S44. Fluorescence intensity after four cycles.



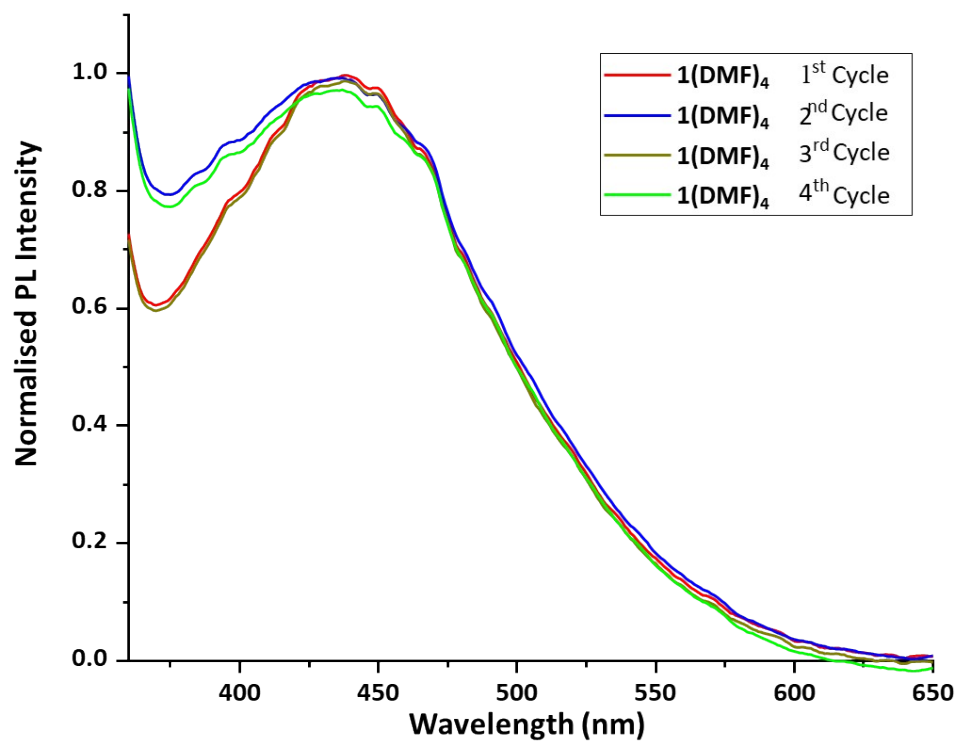

**Figure S45.** Emission spectra of thin film of  $1(\text{DMF})_4$  and PA; Spectra were taken after recovering  $1(\text{DMF})_4$  by removing PA.

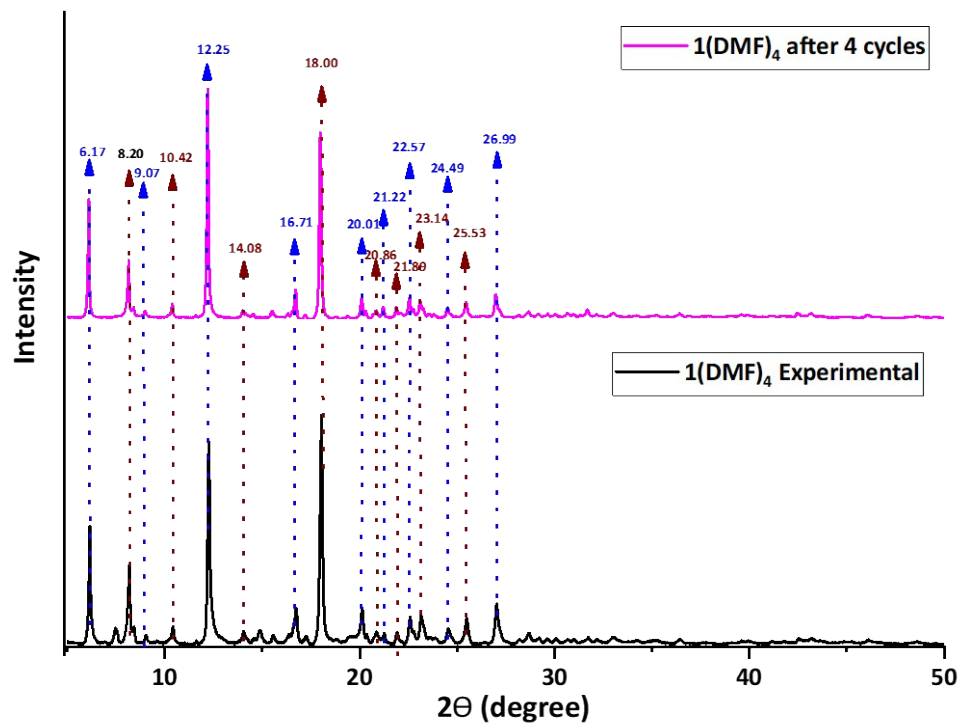

Figure S46. PXRD of  $1(\text{DMF})_4$ : Experimental  $1(\text{DMF})_4$  and  $1(\text{DMF})_4$  recovered after removing PA (4<sup>th</sup> cycle).

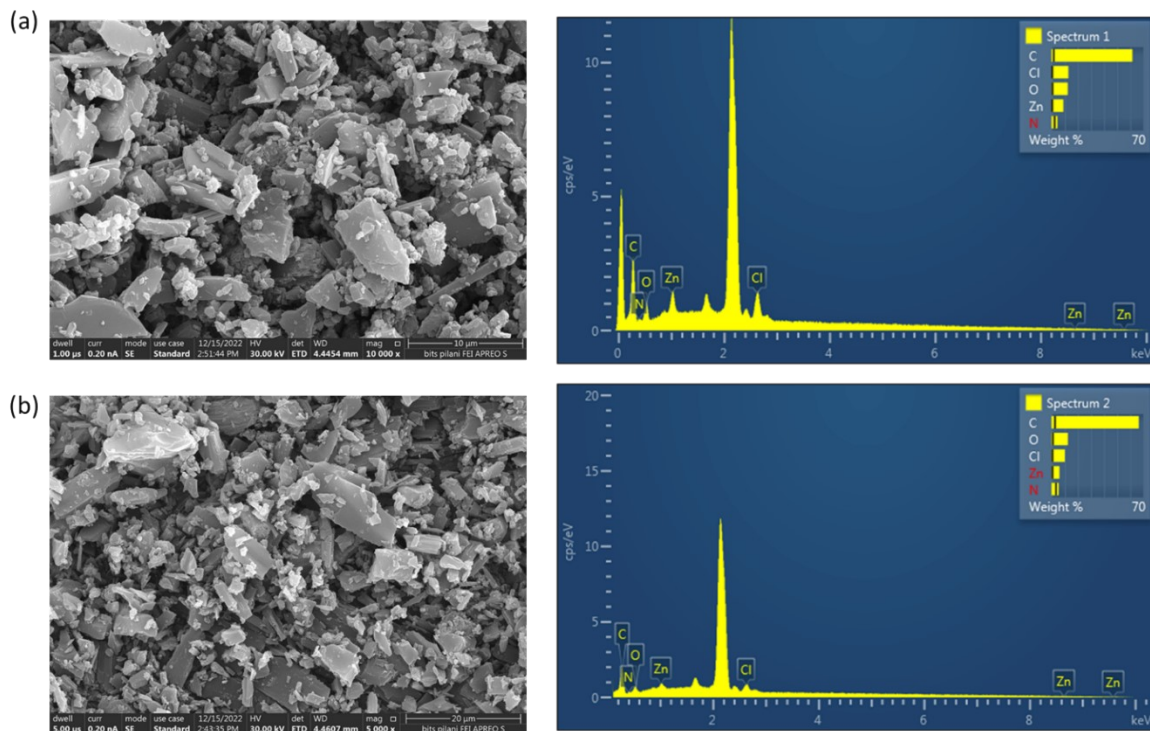

**Figure S47.** SEM-EDX Morphology of (a)  $1(\text{DMF})_4$ , (b)  $1(\text{DMF})_4$  after PA intake; Mapping of (c)  $1(\text{DMF})_4$  [Molecular weight of  $1(\text{DMF})_4:(\text{C}_{44}\text{H}_{40}\text{N}_8\text{Cl}_2\text{O}_9\text{Zn})=961$ ; Molecular weight after removing DMF and hydrogen atoms =789] Observed wt.% of Zn = 8.94%; Calculated wt% Zn =8.23%] (d) 1:1 ratio of  $1(\text{DMF})_4$  and PA (Solid sample) [Molecular weight of  $1(\text{DMF})_4:\text{PA}$  (1:1 ratio):  $(\text{C}_{44}\text{H}_{40}\text{N}_8\text{Cl}_2\text{O}_9\text{Zn})=961+229.1=1188.1$  (Molecular weight excluding hydrogen=1145.1) Observed wt.% of Zn = 5.90%; Calculated wt% Zn =5.70%] (Asymmetric unit of  $1(\text{DMF})_4$  is considered for calculation).

**Table S1** Crystal data and structure refinement for **1(DMF)<sub>4</sub>**

|                                                       |                                                                                                                                                         |
|-------------------------------------------------------|---------------------------------------------------------------------------------------------------------------------------------------------------------|
| Empirical formula                                     | C <sub>88</sub> H <sub>80</sub> Cl <sub>4</sub> N <sub>16</sub> O <sub>18</sub> Zn <sub>2</sub>                                                         |
| Formula weight                                        | 1922.22                                                                                                                                                 |
| Temperature/K                                         | 93(2)                                                                                                                                                   |
| SSSS                                                  | monoclinic                                                                                                                                              |
| Space group                                           | <i>P2<sub>1</sub>/n</i>                                                                                                                                 |
| <i>a</i> /Å                                           | 17.2400(3)                                                                                                                                              |
| <i>b</i> /Å                                           | 11.9521(2)                                                                                                                                              |
| <i>c</i> /Å                                           | 21.5421(4)                                                                                                                                              |
| $\alpha$ /°                                           | 90                                                                                                                                                      |
| $\beta$ /°                                            | 98.188(2)                                                                                                                                               |
| $\gamma$ /°                                           | 90                                                                                                                                                      |
| Volume/Å <sup>3</sup>                                 | 4393.59(14)                                                                                                                                             |
| Z                                                     | 2                                                                                                                                                       |
| $\rho_{\text{calc}}$ /cm <sup>3</sup>                 | 1.453                                                                                                                                                   |
| $\mu$ /mm <sup>-1</sup>                               | 2.446                                                                                                                                                   |
| F(000)                                                | 1984.0                                                                                                                                                  |
| 2 $\theta$ range for data collection/°                | 8.294 to 159.352                                                                                                                                        |
| Index ranges                                          | -21 ≤ <i>h</i> ≤ 21, -14 ≤ <i>k</i> ≤ 14, -27 ≤ <i>l</i> ≤ 27                                                                                           |
| Reflections collected                                 | 15886                                                                                                                                                   |
| Independent reflections                               | 11452 [ <i>R</i> <sub>int</sub> = 0.063 (component 1 (71%) and <i>R</i> <sub>int</sub> = 0.113 (component 2 (29%), <i>R</i> <sub>sigma</sub> = 0.0534]* |
| Data/restraints/parameters                            | 11452/0/582                                                                                                                                             |
| Goodness-of-fit on F <sup>2</sup>                     | 0.987                                                                                                                                                   |
| Final R indexes [ <i>I</i> ≥ 2 $\sigma$ ( <i>I</i> )] | <i>R</i> <sub>1</sub> <sup>a</sup> = 0.0614, <i>wR</i> <sub>2</sub> <sup>b</sup> = 0.1553                                                               |
| Final R indexes [all data]                            | <i>R</i> <sub>1</sub> <sup>a</sup> = 0.0848, <i>wR</i> <sub>2</sub> <sup>b</sup> = 0.1672                                                               |
| Largest diff. peak/hole / e Å <sup>-3</sup>           | 0.89/-0.88                                                                                                                                              |

<sup>a</sup>  $R_1 = \sum ||F_o| - |F_c|| / \sum |F_o|$ . <sup>b</sup>  $wR_2 = [\sum w(F_o^2 - F_c^2)^2 / \sum w(F_o^2)^2]^{1/2}$ , where  $w = 1/[\sigma^2(F_o^2) + (aP)^2 + bP]$ ,  $P = (F_o^2 + 2F_c^2)/3$ .

\*The crystal structure is twin modelled with component 1 (71%) and component 2 (29%).

**Table S2** Bond lengths and bond angles in metal coordination sphere in **1(DMF)<sub>4</sub>**

| D-H...A                                                                                                              | d(D-H)/Å | d(H-A)/Å | d(D-A)/Å | D-H-A/° |
|----------------------------------------------------------------------------------------------------------------------|----------|----------|----------|---------|
| N1-H1...O8 <sup>a</sup>                                                                                              | 0.88     | 2.16     | 3.006(4) | 160.7   |
| N2-H2...O4 <sup>b</sup>                                                                                              | 0.88     | 2.12     | 2.910(4) | 149.7   |
| N3-H3...O7 <sup>b</sup>                                                                                              | 0.88     | 2.04     | 2.900(4) | 164.5   |
| Symmetry codes: <sup>a</sup> + <i>x</i> ,+ <i>y</i> ,+ <i>z</i> ; <sup>b</sup> + <i>x</i> ,1+ <i>y</i> ,+ <i>z</i> . |          |          |          |         |

**Table S3** Distances and angles in hydrogen bond interactions in **1(DMF)<sub>4</sub>**

| Bond Lengths |       |            | Bond Angles |       |       |           |
|--------------|-------|------------|-------------|-------|-------|-----------|
| Atom1        | Atom2 | Length (Å) | Atom1       | Atom2 | Atom3 | Angle (°) |
| Zn1          | O4    | 2.016(2)   | O4          | Zn1   | O5    | 57.9(1)   |
| Zn1          | O5    | 2.446(3)   | O4          | Zn1   | O6    | 96.2(1)   |
| Zn1          | O6    | 1.980(3)   | O4          | Zn1   | N4    | 138.4(1)  |
| Zn1          | N4    | 2.020(3)   | O4          | Zn1   | N5    | 102.8(1)  |
| Zn1          | N5    | 2.053(3)   | O5          | Zn1   | O6    | 154.0(1)  |
|              |       |            | O5          | Zn1   | N4    | 91.4(1)   |
|              |       |            | O5          | Zn1   | N5    | 90.9(1)   |
|              |       |            | O6          | Zn1   | N4    | 109.2(1)  |
|              |       |            | O6          | Zn1   | N5    | 98.5(1)   |
|              |       |            | N4          | Zn1   | N5    | 105.2(1)  |

| S.No. | Compound                  | Concentration of <b>1(DMF)<sub>4</sub></b> | Concentration of PA      | Lifetime (ns) |
|-------|---------------------------|--------------------------------------------|--------------------------|---------------|
| 1.    | <b>1(DMF)<sub>4</sub></b> | 10 <sup>-5</sup> M                         | -                        | 0.36 ns       |
| 2.    | Solution 1                | 10 <sup>-5</sup> M                         | 5 × 10 <sup>-7</sup> M   | 0.35 ns       |
| 3.    | Solution 2                | 10 <sup>-5</sup> M                         | 1.5 × 10 <sup>-6</sup> M | 0.34 ns       |
| 4.    | Solution 3                | 10 <sup>-5</sup> M                         | 3 × 10 <sup>-6</sup> M   | 0.34 ns       |
| 5.    | Solution 4                | 10 <sup>-5</sup> M                         | 4.5 × 10 <sup>-6</sup> M | 0.33 ns       |
| 6.    | Solution 5                | 10 <sup>-5</sup> M                         | 6.5 × 10 <sup>-6</sup> M | 0.32 ns       |

**Table S4** Lifetime data of **1(DMF)<sub>4</sub>**. (Lifetime plots are shown in fig. S20)**Table S5** Photophysical data of **1(DMF)<sub>4</sub>** in DMSO and solid state (Absorption and emission plots are shown in fig. S10 and S11)

| S.No. | Photophysical Data                               | <b>1(DMF)<sub>4</sub></b> in DMSO                         | <b>1(DMF)<sub>4</sub></b> in Solid State                 |
|-------|--------------------------------------------------|-----------------------------------------------------------|----------------------------------------------------------|
| 1.    | UV Maxima ( $\lambda_{\max}$ , $\epsilon$ )      | 278 nm, 38959 M <sup>-1</sup> cm <sup>-1</sup>            | 245 nm and 290 nm                                        |
| 2.    | PL Maxima ( $\lambda_{\text{em}}$ , Stoke shift) | 409 nm, 169491.53 cm <sup>-1</sup><br>(Slit Width = 4 nm) | 430 nm, 125000 cm <sup>-1</sup><br>(Slit Width = 2.5 nm) |
| 3.    | Quantum Yield ( $\phi$ )                         | 0.4 %*                                                    | 6.03 %*                                                  |

\* Absolute quantum yield

**Table S6** Comparison of **1(DMF)<sub>4</sub>** with literature reports

| Type of Probes                     | Reported Probes                                                                                                      | Detection Limit / Medium                                                                                                                                | K <sub>sv</sub> Value                                                             |
|------------------------------------|----------------------------------------------------------------------------------------------------------------------|---------------------------------------------------------------------------------------------------------------------------------------------------------|-----------------------------------------------------------------------------------|
| Metalloacycles/Metal Organic Cages | <b>This work</b>                                                                                                     | 6.89 × 10 <sup>-11</sup> M of picrate ion in liquid state (DMSO) and 0.49 ng/cm <sup>2</sup> of picric acid in solid state.                             | 5.174 × 10 <sup>4</sup> M                                                         |
|                                    | <b>Pd-Macrocycle (1&amp;2)<sup>1</sup></b>                                                                           | 287 nm & 71 nm in EtOH                                                                                                                                  | 6.73 × 10 <sup>4</sup> M and 2.61 × 10 <sup>5</sup> M                             |
|                                    | <b>Re(I)-metallacycles (3b &amp; 4)<sup>2</sup></b>                                                                  | Medium= 60% aqueous THF solution                                                                                                                        | 2.6 × 10 <sup>4</sup> M and 4.38 × 10 <sup>4</sup> M                              |
|                                    | <b>Zn (II)- metallacycle<sup>3</sup></b>                                                                             | 7.62 × 10 <sup>-8</sup> M in 50% H <sub>2</sub> O: EtOH                                                                                                 | 3.44 × 10 <sup>4</sup> M                                                          |
|                                    | <b>Pt (II) - metallacycle<sup>4</sup></b>                                                                            | 3.01 × 10 <sup>-7</sup> M in CH <sub>2</sub> Cl <sub>2</sub>                                                                                            | 1.3 × 10 <sup>5</sup> M <sup>-1</sup>                                             |
|                                    | <b>3d – 4f metal–organic cages (1&amp;2)<sup>5</sup></b>                                                             | 79 ppb and 60 ppb in DMSO (LOD = C <sub>s</sub> × D <sub>a</sub> )<br>C <sub>s</sub> is concentration of sensors and D <sub>a</sub> is equivalent of PA | 7.79 × 10 <sup>4</sup> M <sup>-1</sup> and 1.33 × 10 <sup>5</sup> M <sup>-1</sup> |
|                                    | <b>Pt<sup>II</sup>-organometallic (2&amp;3)<sup>6</sup></b>                                                          | Medium = DMF – methanol solution                                                                                                                        | 2.0 × 10 <sup>4</sup> M <sup>-1</sup> and 5.0 × 10 <sup>4</sup> M <sup>-1</sup>   |
| Metal Organic Framework            | <b>Ni-OBA-Bpy-18 MOF/glassy carbon electrode<sup>7</sup></b>                                                         | 66.43 ppb in vapour phase and water 0.6 ppm                                                                                                             | 3.45 × 10 <sup>5</sup> M <sup>-1</sup>                                            |
|                                    | <b>{[Eu<sub>2</sub>(MFDA)<sub>2</sub>(HCOO)<sub>2</sub>(H<sub>2</sub>O)<sub>6</sub>·H<sub>2</sub>O]<sub>n</sub>}</b> | 4.5 × 10 <sup>-7</sup> M in DMF                                                                                                                         | -                                                                                 |
|                                    | <b>CJLU-1<sup>9</sup></b>                                                                                            | 0.362 μM in ethanol                                                                                                                                     | 2.60 × 10 <sup>5</sup> M <sup>-1</sup>                                            |
|                                    | <b>{Zn<sub>2</sub>(tpt)<sub>2</sub>(tad)<sub>2</sub>·H<sub>2</sub>O}<sup>10</sup></b>                                | 2.56 × 10 <sup>-6</sup> M in water                                                                                                                      | 7.8 × 10 <sup>4</sup> M <sup>-1</sup>                                             |

**References.**

1. S. Kumar, R. Kishan, P. Kumar, S. Pachisia and R. Gupta, *Inorganic Chemistry*, 2018, **57**, 1693-1697.
2. M. Nurnabi, S. Gurusamy, J.-Y. Wu, C.-C. Lee, M. Sathiyendiran, S.-M. Huang, C.-H. Chang, I. Chao, G.-H. Lee, S.-M. Peng, V. Sathish, P. Thanasekaran and K.-L. Lu, *Dalton Transactions*, 2023, **52**, 1939-1949.
3. P. Chand and A. Kumar, *New Journal of Chemistry*, 2024, **48**, 11530-11541.
4. Y. Hou, S. Li, Z. Zhang, L. Chen and M. Zhang, *Polymer Chemistry*, 2020, **11**, 254-258.
5. Q. Tang, Y. Sun, H.-Y. Li, J.-Q. Wu, Y.-N. Liang and Z. Zhang, *Applied Organometallic Chemistry*, 2019, **33**, 4814.
6. S. Shanmugaraju, S. A. Joshi and P. S. Mukherjee, *Inorganic Chemistry*, 2011, **50**, 11736-11745.
7. S. Chongdar, U. Mondal, T. Chakraborty, P. Banerjee and A. Bhaumik, *ACS Applied Materials & Interfaces*, 2023, **15**, 14575-14586.
8. X.-H. Zhou, L. Li, H.-H. Li, A. Li, T. Yang and W. Huang, *Dalton Transactions*, 2013, **42**, 12403-12409.
9. H. Xu, F. Zhong, F. Chen, T.-X. Luan, P. Li, S. Xu and J. Gao, *Journal of Materials Chemistry C*, 2022, **10**, 7469-7475.
10. X. Zhuang, X. Zhang, N. Zhang, Y. Wang, L. Zhao and Q. Yang, *Crystal Growth & Design*, 2019, **19**, 5729-5736.
